# Supplementary material for: Building a green Belt and Road: A systematic review and comparative assessment of the Chinese and English-language literature
Source: PLoS One. 2020 Sep 15;15(9):e0239009. doi: 10.1371/journal.pone.0239009 (PMC7492099; doi:10.1371/journal.pone.0239009)
Supplement: S2 Dataset — (CSV) [file pone.0239009.s004.csv]

	word_count	sd	ave_sentiment	Source	Language	Source.Lang	Year	Country	Disciplines	Var	Ave_SD	Average	Funding
1	2104	0.294581591	0.230160964	BRI papers	CN	BRI papers CN	2018	China	Finance	0.086778314	0.305709546	0.213092737	Other/None
2	3551	0.310207277	0.287845988	BRI papers	CN	BRI papers CN	2018	China	Finance	0.096228554	0.305709546	0.213092737	China
3	1059	0.281841838	0.341664696	BRI papers	CN	BRI papers CN	2018	China	Econs	0.079434821	0.271477928	0.195389263	China
4	2333	0.309057724	0.307316682	BRI papers	CN	BRI papers CN	2018	China	Econs	0.095516677	0.271477928	0.195389263	Other/None
5	3530	0.274742852	0.251083716	BRI papers	CN	BRI papers CN	2018	China	Others	0.075483635	0.278348126	0.214834834	China
6	1140	0.279260897	0.262855283	BRI papers	CN	BRI papers CN	2018	China	Econs	0.077986649	0.271477928	0.195389263	China
7	2826	0.264301661	0.207427585	BRI papers	CN	BRI papers CN	2018	China	Econs	0.069855368	0.271477928	0.195389263	China
8	6091	0.349938112	0.209738796	BRI papers	CN	BRI papers CN	2018	China	Econs	0.122456682	0.271477928	0.195389263	China
9	1215	0.367730588	0.280856399	BRI papers	CN	BRI papers CN	2018	China	Finance	0.135225786	0.305709546	0.213092737	China
10	4780	0.338785575	0.290743697	BRI papers	CN	BRI papers CN	2018	China	Others	0.114775666	0.278348126	0.214834834	China
11	6491	0.318252298	0.272069708	BRI papers	CN	BRI papers CN	2018	China	Others	0.101284525	0.278348126	0.214834834	Other/None
12	10725	0.334135645	0.244444777	BRI papers	CN	BRI papers CN	2018	China	Econs	0.111646629	0.271477928	0.195389263	China
13	2190	0.271637139	0.266192598	BRI papers	CN	BRI papers CN	2018	China	Policy/Law	0.073786735	0.283202123	0.20446591	China
14	4310	0.341104242	0.297399912	BRI papers	CN	BRI papers CN	2018	China	Geog	0.116352104	0.255830395	0.173326439	Other/None
15	1327	0.333320131	0.306118918	BRI papers	CN	BRI papers CN	2018	China	Others	0.11110231	0.278348126	0.214834834	China
16	5550	0.304821577	0.325509593	BRI papers	CN	BRI papers CN	2018	China	Others	0.092916194	0.278348126	0.214834834	Other/None
17	4575	0.248976269	0.266139846	BRI papers	CN	BRI papers CN	2018	China	Others	0.061989183	0.278348126	0.214834834	China
18	6054	0.237019349	0.143720318	BRI papers	CN	BRI papers CN	2018	China	Finance	0.056178172	0.305709546	0.213092737	Other/None
19	1219	0.300017427	0.262686616	BRI papers	CN	BRI papers CN	2018	China	Finance	0.090010456	0.305709546	0.213092737	Other/None
20	3870	0.311395924	0.273801063	BRI papers	CN	BRI papers CN	2018	China	Others	0.096967422	0.278348126	0.214834834	Other/None
21	6492	0.278758702	0.304640392	BRI papers	CN	BRI papers CN	2018	China	Others	0.077706414	0.278348126	0.214834834	Other/None
22	2999	0.256590564	0.182959425	BRI papers	CN	BRI papers CN	2018	China	Finance	0.065838718	0.305709546	0.213092737	China
23	2113	0.227931602	0.20606941	BRI papers	CN	BRI papers CN	2018	China	Finance	0.051952815	0.305709546	0.213092737	Other/None
24	4777	0.288815507	0.258964266	BRI papers	CN	BRI papers CN	2018	China	Others	0.083414397	0.278348126	0.214834834	Other/None
25	3190	0.343819566	0.190172833	BRI papers	CN	BRI papers CN	2018	China	Others	0.118211894	0.278348126	0.214834834	Other/None
26	3950	0.287758779	0.184276261	BRI papers	CN	BRI papers CN	2018	China	Others	0.082805115	0.278348126	0.214834834	Other/None
27	3839	0.309283387	0.231247816	BRI papers	CN	BRI papers CN	2018	China	Econs	0.095656214	0.271477928	0.195389263	Other/None
28	2091	0.299934586	0.318636864	BRI papers	CN	BRI papers CN	2018	China	Policy/Law	0.089960756	0.283202123	0.20446591	Other/None
29	4579	0.243711923	-0.114981446	BRI papers	CN	BRI papers CN	2018	China	Econs	0.059395502	0.271477928	0.195389263	China
30	2216	0.312473408	0.214750043	BRI papers	CN	BRI papers CN	2018	China	Finance	0.097639631	0.305709546	0.213092737	Other/None
31	4486	0.219221726	0.149583701	BRI papers	CN	BRI papers CN	2018	China	Econs	0.048058165	0.271477928	0.195389263	China
32	3563	0.275735079	0.232689847	BRI papers	CN	BRI papers CN	2018	China	Econs	0.076029834	0.271477928	0.195389263	China
33	2794	0.294254492	0.272859757	BRI papers	CN	BRI papers CN	2018	China	Others	0.086585706	0.278348126	0.214834834	China
34	3173	0.229491067	0.133192879	BRI papers	CN	BRI papers CN	2018	China	Finance	0.05266615	0.305709546	0.213092737	China
35	6217	0.296898468	0.277039732	BRI papers	CN	BRI papers CN	2018	China	Others	0.0881487	0.278348126	0.214834834	China
36	4651	0.245464818	0.282472305	BRI papers	CN	BRI papers CN	2018	China	Finance	0.060252977	0.305709546	0.213092737	Other/None
37	3435	0.324318699	0.377263885	BRI papers	CN	BRI papers CN	2018	China	Geog	0.105182619	0.255830395	0.173326439	Other/None
38	3211	0.293175031	0.221624534	BRI papers	CN	BRI papers CN	2018	China	Econs	0.085951599	0.271477928	0.195389263	China
39	5190	0.329298094	0.422983551	BRI papers	CN	BRI papers CN	2018	China	Econs	0.108437234	0.271477928	0.195389263	China
40	5906	0.261096551	0.161542028	BRI papers	CN	BRI papers CN	2017	China	Geog	0.068171409	0.255830395	0.173326439	China
41	1072	0.305273755	0.195811803	BRI papers	CN	BRI papers CN	2018	China	Econs	0.093192065	0.271477928	0.195389263	Other/None
42	5089	0.254755706	0.244524414	BRI papers	CN	BRI papers CN	2018	China	Others	0.06490047	0.278348126	0.214834834	Other/None
43	3468	0.292335249	0.195031465	BRI papers	CN	BRI papers CN	2018	China	Geog	0.085459898	0.255830395	0.173326439	China
44	7473	0.305764258	0.189980755	BRI papers	CN	BRI papers CN	2018	China	Others	0.093491782	0.278348126	0.214834834	Other/None
45	3674	0.344198372	0.18713432	BRI papers	CN	BRI papers CN	2018	China	Others	0.118472519	0.278348126	0.214834834	Other/None
46	1609	0.286564159	0.162226085	BRI papers	CN	BRI papers CN	2018	China	Policy/Law	0.082119017	0.283202123	0.20446591	Other/None
47	3038	0.519882384	0.528199788	BRI papers	CN	BRI papers CN	2018	China	Policy/Law	0.270277693	0.283202123	0.20446591	Other/None
48	8609	0.278768047	0.276834752	BRI papers	CN	BRI papers CN	2018	China	Others	0.077711624	0.278348126	0.214834834	China
49	4838	0.296630798	0.241912262	BRI papers	CN	BRI papers CN	2018	China	Econs	0.08798983	0.271477928	0.195389263	China
50	3722	0.297075336	0.216677141	BRI papers	CN	BRI papers CN	2018	China	Econs	0.088253755	0.271477928	0.195389263	China
51	5377	0.302061511	0.246132935	BRI papers	CN	BRI papers CN	2018	China	Econs	0.091241156	0.271477928	0.195389263	China
52	4558	0.359311864	0.371122522	BRI papers	CN	BRI papers CN	2018	China	Econs	0.129105016	0.271477928	0.195389263	China
53	1189	0.24911652	0.177658613	BRI papers	CN	BRI papers CN	2018	China	Finance	0.062059041	0.305709546	0.213092737	Other/None
54	3810	0.304216532	0.279655788	BRI papers	CN	BRI papers CN	2018	China	Others	0.092547699	0.278348126	0.214834834	China
55	3178	0.261327355	0.312547867	BRI papers	CN	BRI papers CN	2017	China	Geog	0.068291986	0.255830395	0.173326439	China
56	3276	0.275237705	0.108481234	BRI papers	CN	BRI papers CN	2018	China	Geog	0.075755794	0.255830395	0.173326439	China
57	6071	0.206169357	0.099018068	BRI papers	CN	BRI papers CN	2018	China	Geog	0.042505804	0.255830395	0.173326439	Other/None
58	2650	0.25165059	0.245338374	BRI papers	CN	BRI papers CN	2018	China	Econs	0.063328019	0.271477928	0.195389263	Other/None
59	3560	0.315688966	0.234276043	BRI papers	CN	BRI papers CN	2018	China	Policy/Law	0.099659523	0.283202123	0.20446591	Other/None
60	9658	0.400566397	0.242488302	BRI papers	CN	BRI papers CN	2018	China	Others	0.160453439	0.278348126	0.214834834	China
61	2197	0.234154565	0.260109705	BRI papers	CN	BRI papers CN	2018	China	Econs	0.05482836	0.271477928	0.195389263	China
62	5015	0.236240567	0.087411542	BRI papers	CN	BRI papers CN	2018	China	Policy/Law	0.055809606	0.283202123	0.20446591	Other/None
63	3396	0.285474924	0.273551199	BRI papers	CN	BRI papers CN	2018	China	Policy/Law	0.081495932	0.283202123	0.20446591	Other/None
64	3806	0.242433408	0.239188966	BRI papers	CN	BRI papers CN	2018	China	Econs	0.058773957	0.271477928	0.195389263	Other/None
65	4400	0.343930848	0.363011645	BRI papers	CN	BRI papers CN	2018	China	Finance	0.118288428	0.305709546	0.213092737	Other/None
66	6608	0.267884177	0.21385104	BRI papers	CN	BRI papers CN	2018	China	Policy/Law	0.071761932	0.283202123	0.20446591	Other/None
67	2281	0.336890951	0.405380056	BRI papers	CN	BRI papers CN	2018	China	Econs	0.113495513	0.271477928	0.195389263	China
68	936	0.387669884	0.335213648	BRI papers	CN	BRI papers CN	2018	China	Finance	0.150287939	0.305709546	0.213092737	Other/None
69	2660	0.28650737	0.243862519	BRI papers	CN	BRI papers CN	2018	China	Others	0.082086473	0.278348126	0.214834834	China
70	3382	0.285208956	0.139525002	BRI papers	CN	BRI papers CN	2018	China	Policy/Law	0.081344148	0.283202123	0.20446591	Other/None
71	4609	0.288561925	0.274717911	BRI papers	CN	BRI papers CN	2018	China	Econs	0.083267984	0.271477928	0.195389263	China
72	2375	0.330336246	0.208448862	BRI papers	CN	BRI papers CN	2018	China	Policy/Law	0.109122035	0.283202123	0.20446591	China
73	3727	0.285299354	0.127523965	BRI papers	CN	BRI papers CN	2018	China	Econs	0.081395722	0.271477928	0.195389263	China
74	5544	0.319806632	0.235935963	BRI papers	CN	BRI papers CN	2018	China	Policy/Law	0.102276282	0.283202123	0.20446591	Other/None
75	4263	0.311893929	0.268564615	BRI papers	CN	BRI papers CN	2017	China	Policy/Law	0.097277823	0.283202123	0.20446591	Other/None
76	4114	0.285958663	0.189428326	BRI papers	CN	BRI papers CN	2017	China	Econs	0.081772357	0.271477928	0.195389263	China
77	2361	0.294000882	0.296484665	BRI papers	CN	BRI papers CN	2017	China	Policy/Law	0.086436519	0.283202123	0.20446591	Other/None
78	4273	0.217739077	0.205150377	BRI papers	CN	BRI papers CN	2017	China	Econs	0.047410306	0.271477928	0.195389263	China
79	6211	0.321394935	0.334521732	BRI papers	CN	BRI papers CN	2017	China	Geog	0.103294704	0.255830395	0.173326439	China
80	4331	0.328400652	0.177408413	BRI papers	CN	BRI papers CN	2017	China	Policy/Law	0.107846988	0.283202123	0.20446591	Other/None
81	4533	0.242818445	0.208633142	BRI papers	CN	BRI papers CN	2017	China	Econs	0.058960797	0.271477928	0.195389263	China
82	5165	0.345307068	0.225152028	BRI papers	CN	BRI papers CN	2017	China	Finance	0.119236971	0.305709546	0.213092737	China
83	4020	0.306412888	0.227817816	BRI papers	CN	BRI papers CN	2017	China	Geog	0.093888858	0.255830395	0.173326439	Other/None
84	3915	0.320328318	0.200774069	BRI papers	CN	BRI papers CN	2017	China	Econs	0.102610231	0.271477928	0.195389263	China
85	2933	0.340351046	0.203962427	BRI papers	CN	BRI papers CN	2017	China	Others	0.115838834	0.278348126	0.214834834	Other/None
86	5268	0.32883252	0.2624455	BRI papers	CN	BRI papers CN	2017	China	Finance	0.108130826	0.305709546	0.213092737	Other/None
87	4805	0.289103583	0.125954879	BRI papers	CN	BRI papers CN	2017	China	Finance	0.083580882	0.305709546	0.213092737	Other/None
88	3921	0.32688936	0.356026814	BRI papers	CN	BRI papers CN	2017	China	Policy/Law	0.106856654	0.283202123	0.20446591	Other/None
89	5524	0.332168631	0.212598045	BRI papers	CN	BRI papers CN	2017	China	Policy/Law	0.110336	0.283202123	0.20446591	Other/None
90	1679	0.326177114	0.369076749	BRI papers	CN	BRI papers CN	2017	Foreign	Policy/Law	0.10639151	0.283202123	0.20446591	Other/None
91	5858	0.273535991	0.196425633	BRI papers	CN	BRI papers CN	2017	China	Policy/Law	0.074821938	0.283202123	0.20446591	Other/None
92	3458	0.253792739	0.256179296	BRI papers	CN	BRI papers CN	2017	China	Policy/Law	0.064410754	0.283202123	0.20446591	Other/None
93	6531	0.269495609	0.151097947	BRI papers	CN	BRI papers CN	2017	China	Policy/Law	0.072627883	0.283202123	0.20446591	Other/None
94	5241	0.324613706	0.216654154	BRI papers	CN	BRI papers CN	2017	China	Policy/Law	0.105374058	0.283202123	0.20446591	Other/None
95	2723	0.284859256	0.2442731	BRI papers	CN	BRI papers CN	2018	China	Geog	0.081144796	0.255830395	0.173326439	China
96	1903	0.311812687	0.253783793	BRI papers	CN	BRI papers CN	2017	China	Geog	0.097227152	0.255830395	0.173326439	Other/None
97	6270	0.299030213	0.163866935	BRI papers	CN	BRI papers CN	2017	China	Econs	0.089419068	0.271477928	0.195389263	Other/None
98	4763	0.388766756	0.360175034	BRI papers	CN	BRI papers CN	2017	China	Policy/Law	0.15113959	0.283202123	0.20446591	Other/None
99	9991	0.27696096	0.113677489	BRI papers	CN	BRI papers CN	2017	China	Others	0.076707373	0.278348126	0.214834834	Other/None
100	2765	0.322773831	0.179659536	BRI papers	CN	BRI papers CN	2017	China	Policy/Law	0.104182946	0.283202123	0.20446591	Other/None
101	979	0.340264269	0.179720224	BRI papers	CN	BRI papers CN	2017	China	Policy/Law	0.115779773	0.283202123	0.20446591	Other/None
102	4807	0.351451094	0.172937265	BRI papers	CN	BRI papers CN	2017	China	Finance	0.123517872	0.305709546	0.213092737	Other/None
103	4494	0.335249215	0.214178811	BRI papers	CN	BRI papers CN	2018	China	Policy/Law	0.112392036	0.283202123	0.20446591	Other/None
104	6078	0.332777286	0.299111252	BRI papers	CN	BRI papers CN	2017	China	Finance	0.110740722	0.305709546	0.213092737	Other/None
105	2762	0.305839854	0.10875527	BRI papers	CN	BRI papers CN	2017	China	Policy/Law	0.093538016	0.283202123	0.20446591	Other/None
106	5600	0.354918194	0.201199726	BRI papers	CN	BRI papers CN	2017	China	Others	0.125966925	0.278348126	0.214834834	Other/None
107	4761	0.279587667	0.133440844	BRI papers	CN	BRI papers CN	2017	China	Policy/Law	0.078169263	0.283202123	0.20446591	Other/None
108	4811	0.270793122	0.22296515	BRI papers	CN	BRI papers CN	2017	China	Policy/Law	0.073328915	0.283202123	0.20446591	Other/None
109	6331	0.329322596	0.197248301	BRI papers	CN	BRI papers CN	2017	China	Econs	0.108453373	0.271477928	0.195389263	China
110	2468	0.32687163	0.368429328	BRI papers	CN	BRI papers CN	2017	China	Econs	0.106845063	0.271477928	0.195389263	China
111	2400	0.247888066	0.309726221	BRI papers	CN	BRI papers CN	2017	China	Others	0.061448493	0.278348126	0.214834834	Other/None
112	4753	0.27647774	0.152431882	BRI papers	CN	BRI papers CN	2017	China	Policy/Law	0.076439941	0.283202123	0.20446591	Other/None
113	1359	0.322857009	0.418590232	BRI papers	CN	BRI papers CN	2017	China	Geog	0.104236648	0.255830395	0.173326439	China
114	1613	0.365170581	0.314477046	BRI papers	CN	BRI papers CN	2017	China	Econs	0.133349553	0.271477928	0.195389263	China
115	2392	0.327794436	0.229385991	BRI papers	CN	BRI papers CN	2017	China	Finance	0.107449192	0.305709546	0.213092737	Other/None
116	5209	0.352877356	0.237791405	BRI papers	CN	BRI papers CN	2017	China	Policy/Law	0.124522428	0.283202123	0.20446591	Other/None
117	6037	0.293954696	0.144489421	BRI papers	CN	BRI papers CN	2017	China	Finance	0.086409363	0.305709546	0.213092737	Other/None
118	5361	0.325930527	0.403114441	BRI papers	CN	BRI papers CN	2017	China	Geog	0.106230708	0.255830395	0.173326439	Other/None
119	2254	0.405911507	0.203711173	BRI papers	CN	BRI papers CN	2017	China	Finance	0.164764151	0.305709546	0.213092737	Other/None
120	2730	0.285814022	0.142875671	BRI papers	CN	BRI papers CN	2017	China	Policy/Law	0.081689655	0.283202123	0.20446591	Other/None
121	2017	0.285459569	0.340094321	BRI papers	CN	BRI papers CN	2017	China	Others	0.081487165	0.278348126	0.214834834	Other/None
122	3257	0.279695149	0.232539459	BRI papers	CN	BRI papers CN	2017	China	Policy/Law	0.078229376	0.283202123	0.20446591	Other/None
123	1078	0.26231542	0.36456918	BRI papers	CN	BRI papers CN	2017	China	Finance	0.068809379	0.305709546	0.213092737	Other/None
124	999	0.382841179	0.416327571	BRI papers	CN	BRI papers CN	2017	China	Geog	0.146567368	0.255830395	0.173326439	China
125	5496	0.238316803	0.255262782	BRI papers	CN	BRI papers CN	2017	China	Geog	0.056794898	0.255830395	0.173326439	Other/None
126	5687	0.303795828	0.062422498	BRI papers	CN	BRI papers CN	2017	China	Geog	0.092291905	0.255830395	0.173326439	China
127	3722	0.314368144	0.332174292	BRI papers	CN	BRI papers CN	2017	China	Finance	0.09882733	0.305709546	0.213092737	Other/None
128	1721	0.3220162	0.308211828	BRI papers	CN	BRI papers CN	2017	China	Econs	0.103694433	0.271477928	0.195389263	China
129	3102	0.299538568	0.376170048	BRI papers	CN	BRI papers CN	2017	China	Geog	0.089723354	0.255830395	0.173326439	China
130	2674	0.290668665	0.303767663	BRI papers	CN	BRI papers CN	2017	China	Econs	0.084488273	0.271477928	0.195389263	Other/None
131	3550	0.338565189	0.175138534	BRI papers	CN	BRI papers CN	2017	China	Finance	0.114626387	0.305709546	0.213092737	Other/None
132	3713	0.259072614	0.15839979	BRI papers	CN	BRI papers CN	2017	China	Finance	0.06711862	0.305709546	0.213092737	Other/None
133	2153	0.293424473	0.154533121	BRI papers	CN	BRI papers CN	2017	China	Policy/Law	0.086097921	0.283202123	0.20446591	Other/None
134	3188	0.297687931	0.251417453	BRI papers	CN	BRI papers CN	2017	China	Econs	0.088618104	0.271477928	0.195389263	China
135	1674	0.283065207	0.178156494	BRI papers	CN	BRI papers CN	2017	China	Policy/Law	0.080125911	0.283202123	0.20446591	Other/None
136	1854	0.263530044	0.140052819	BRI papers	CN	BRI papers CN	2017	China	Others	0.069448084	0.278348126	0.214834834	Other/None
137	1748	0.326340923	0.294619198	BRI papers	CN	BRI papers CN	2017	China	Finance	0.106498398	0.305709546	0.213092737	Other/None
138	3743	0.285407538	0.061805263	BRI papers	CN	BRI papers CN	2017	China	Finance	0.081457463	0.305709546	0.213092737	Other/None
139	1943	0.286903271	0.241378219	BRI papers	CN	BRI papers CN	2017	China	Policy/Law	0.082313487	0.283202123	0.20446591	China
140	1044	0.30220029	0.384850463	BRI papers	CN	BRI papers CN	2017	China	Others	0.091325016	0.278348126	0.214834834	Other/None
141	4991	0.304971933	0.12283764	BRI papers	CN	BRI papers CN	2017	China	Others	0.09300788	0.278348126	0.214834834	China
142	3787	0.27318703	0.078128039	BRI papers	CN	BRI papers CN	2017	China	Econs	0.074631153	0.271477928	0.195389263	China
143	7051	0.255122994	0.183218685	BRI papers	CN	BRI papers CN	2017	China	Econs	0.065087742	0.271477928	0.195389263	Other/None
144	2775	0.258381773	0.224700655	BRI papers	CN	BRI papers CN	2017	China	Econs	0.06676114	0.271477928	0.195389263	China
145	5204	0.197582844	0.168568804	BRI papers	CN	BRI papers CN	2017	China	Finance	0.03903898	0.305709546	0.213092737	Other/None
146	1648	0.311963513	0.266286973	BRI papers	CN	BRI papers CN	2017	China	Finance	0.097321233	0.305709546	0.213092737	Other/None
147	1387	0.24994196	0.164598636	BRI papers	CN	BRI papers CN	2017	China	Others	0.062470983	0.278348126	0.214834834	China
148	6105	0.291004223	0.320485999	BRI papers	CN	BRI papers CN	2017	China	Policy/Law	0.084683458	0.283202123	0.20446591	Other/None
149	4791	0.354881446	0.265963478	BRI papers	CN	BRI papers CN	2017	China	Policy/Law	0.125940841	0.283202123	0.20446591	Other/None
150	3108	0.225397955	0.187231476	BRI papers	CN	BRI papers CN	2017	China	Policy/Law	0.050804238	0.283202123	0.20446591	Other/None
151	1713	0.304239094	0.198152134	BRI papers	CN	BRI papers CN	2017	China	Policy/Law	0.092561427	0.283202123	0.20446591	Other/None
152	4229	0.305927213	0.284201748	BRI papers	CN	BRI papers CN	2017	China	Policy/Law	0.09359146	0.283202123	0.20446591	Other/None
153	6648	0.290124903	0.136790261	BRI papers	CN	BRI papers CN	2017	China	Econs	0.08417246	0.271477928	0.195389263	China
154	4656	0.315309819	0.303253187	BRI papers	CN	BRI papers CN	2015	China	Geog	0.099420282	0.255830395	0.173326439	China
155	4125	0.305150983	0.234446329	BRI papers	CN	BRI papers CN	2017	China	Others	0.093117123	0.278348126	0.214834834	Other/None
156	5713	0.329690608	0.302782063	BRI papers	CN	BRI papers CN	2017	China	Others	0.108695897	0.278348126	0.214834834	China
157	3238	0.262759185	-0.04765312	BRI papers	CN	BRI papers CN	2017	China	Others	0.069042389	0.278348126	0.214834834	China
158	5714	0.189143617	0.206082927	BRI papers	CN	BRI papers CN	2017	China	Policy/Law	0.035775308	0.283202123	0.20446591	China
159	7054	0.234699921	0.160655337	BRI papers	CN	BRI papers CN	2017	China	Policy/Law	0.055084053	0.283202123	0.20446591	Other/None
160	2439	0.225953887	0.250543039	BRI papers	CN	BRI papers CN	2017	China	Policy/Law	0.051055159	0.283202123	0.20446591	Other/None
161	3992	0.246496587	0.203579258	BRI papers	CN	BRI papers CN	2017	China	Econs	0.060760568	0.271477928	0.195389263	Other/None
162	3203	0.268775789	0.327654277	BRI papers	CN	BRI papers CN	2017	China	Geog	0.072240425	0.255830395	0.173326439	China
163	3521	0.220811152	0.11872337	BRI papers	CN	BRI papers CN	2017	China	Policy/Law	0.048757565	0.283202123	0.20446591	Other/None
164	9475	0.268263431	0.202027956	BRI papers	CN	BRI papers CN	2017	China	Others	0.071965268	0.278348126	0.214834834	Other/None
165	7598	0.224728819	0.184921933	BRI papers	CN	BRI papers CN	2017	China	Others	0.050503042	0.278348126	0.214834834	China
166	7702	0.235560934	0.212982535	BRI papers	CN	BRI papers CN	2016	China	Econs	0.055488954	0.271477928	0.195389263	China
167	4638	0.271320637	0.304454641	BRI papers	CN	BRI papers CN	2016	China	Finance	0.073614888	0.305709546	0.213092737	China
168	7453	0.37861001	-0.005385533	BRI papers	CN	BRI papers CN	2016	China	Policy/Law	0.14334554	0.283202123	0.20446591	China
169	7743	0.296825078	0.085787567	BRI papers	CN	BRI papers CN	2016	China	Others	0.088105127	0.278348126	0.214834834	China
170	2371	0.258020447	0.235902358	BRI papers	CN	BRI papers CN	2016	China	Policy/Law	0.066574551	0.283202123	0.20446591	Other/None
171	967	0.29841524	0.214261913	BRI papers	CN	BRI papers CN	2016	China	Finance	0.089051656	0.305709546	0.213092737	Other/None
172	4219	0.272756111	0.134590059	BRI papers	CN	BRI papers CN	2016	China	Others	0.074395896	0.278348126	0.214834834	Other/None
173	3411	0.322416499	0.184616034	BRI papers	CN	BRI papers CN	2016	China	Econs	0.103952399	0.271477928	0.195389263	China
174	1265	0.296428865	0.184730545	BRI papers	CN	BRI papers CN	2016	China	Policy/Law	0.087870072	0.283202123	0.20446591	Other/None
175	7831	0.259766872	0.203004954	BRI papers	CN	BRI papers CN	2016	China	Policy/Law	0.067478828	0.283202123	0.20446591	Other/None
176	2431	0.266489837	0.224672976	BRI papers	CN	BRI papers CN	2016	China	Finance	0.071016833	0.305709546	0.213092737	Other/None
177	1901	0.387507987	0.332386821	BRI papers	CN	BRI papers CN	2016	China	Geog	0.15016244	0.255830395	0.173326439	China
178	4920	0.268321957	0.17866665	BRI papers	CN	BRI papers CN	2016	China	Policy/Law	0.071996673	0.283202123	0.20446591	Other/None
179	4301	0.291369552	0.295754263	BRI papers	CN	BRI papers CN	2016	China	Policy/Law	0.084896216	0.283202123	0.20446591	Other/None
180	4786	0.316518487	0.053395203	BRI papers	CN	BRI papers CN	2016	China	Policy/Law	0.100183953	0.283202123	0.20446591	China
181	3885	0.274668529	0.117570337	BRI papers	CN	BRI papers CN	2016	China	Policy/Law	0.075442801	0.283202123	0.20446591	Other/None
182	5598	0.26414299	0.253940247	BRI papers	CN	BRI papers CN	2016	China	Geog	0.069771519	0.255830395	0.173326439	China
183	4997	0.250200304	0.128888712	BRI papers	CN	BRI papers CN	2016	China	Policy/Law	0.062600192	0.283202123	0.20446591	Other/None
184	1435	0.293246194	0.074531987	BRI papers	CN	BRI papers CN	2016	China	Econs	0.08599333	0.271477928	0.195389263	China
185	2303	0.240977809	0.210857101	BRI papers	CN	BRI papers CN	2016	China	Policy/Law	0.058070305	0.283202123	0.20446591	China
186	4861	0.26564281	0.144832816	BRI papers	CN	BRI papers CN	2016	China	Others	0.070566102	0.278348126	0.214834834	China
187	7036	0.308969856	0.259887464	BRI papers	CN	BRI papers CN	2016	China	Others	0.095462372	0.278348126	0.214834834	China
188	8262	0.183921692	0.09872616	BRI papers	CN	BRI papers CN	2018	China	Geog	0.033827189	0.255830395	0.173326439	Other/None
189	5845	0.287480401	0.357325228	BRI papers	CN	BRI papers CN	2016	China	Others	0.082644981	0.278348126	0.214834834	Other/None
190	4019	0.348613501	0.286657943	BRI papers	CN	BRI papers CN	2016	China	Others	0.121531373	0.278348126	0.214834834	Other/None
191	6708	0.287717948	0.173781102	BRI papers	CN	BRI papers CN	2016	China	Policy/Law	0.082781617	0.283202123	0.20446591	China
192	1675	0.304153887	0.400844925	BRI papers	CN	BRI papers CN	2016	China	Others	0.092509587	0.278348126	0.214834834	Other/None
193	2016	0.291316185	0.190765504	BRI papers	CN	BRI papers CN	2016	China	Others	0.08486512	0.278348126	0.214834834	Other/None
194	5600	0.354918194	0.201199726	BRI papers	CN	BRI papers CN	2016	China	Policy/Law	0.125966925	0.283202123	0.20446591	China
195	2066	0.249328996	0.250638982	BRI papers	CN	BRI papers CN	2016	China	Policy/Law	0.062164948	0.283202123	0.20446591	China
196	4457	0.260253927	0.191692811	BRI papers	CN	BRI papers CN	2016	China	Policy/Law	0.067732107	0.283202123	0.20446591	China
197	2375	0.34740916	0.238828902	BRI papers	CN	BRI papers CN	2016	China	Geog	0.120693125	0.255830395	0.173326439	China
198	5383	0.239562385	0.118429742	BRI papers	CN	BRI papers CN	2016	China	Policy/Law	0.057390136	0.283202123	0.20446591	Other/None
199	4195	0.320978222	0.334685888	BRI papers	CN	BRI papers CN	2016	China	Others	0.103027019	0.278348126	0.214834834	Other/None
200	3451	0.240867574	0.238988894	BRI papers	CN	BRI papers CN	2016	China	Policy/Law	0.058017188	0.283202123	0.20446591	Other/None
201	3481	0.343848195	0.197525435	BRI papers	CN	BRI papers CN	2016	China	Finance	0.118231581	0.305709546	0.213092737	Other/None
202	2959	0.238535696	0.101357496	BRI papers	CN	BRI papers CN	2016	China	Policy/Law	0.056899278	0.283202123	0.20446591	China
203	1217	0.31616491	0.159949372	BRI papers	CN	BRI papers CN	2016	China	Policy/Law	0.09996025	0.283202123	0.20446591	China
204	2458	0.231099257	0.226556946	BRI papers	CN	BRI papers CN	2016	China	Policy/Law	0.053406866	0.283202123	0.20446591	China
205	4169	0.28405521	0.210662747	BRI papers	CN	BRI papers CN	2016	China	Others	0.080687362	0.278348126	0.214834834	Other/None
206	4904	0.352156031	0.332292085	BRI papers	CN	BRI papers CN	2016	China	Others	0.12401387	0.278348126	0.214834834	China
207	7721	0.271721851	0.186114187	BRI papers	CN	BRI papers CN	2016	China	Econs	0.073832764	0.271477928	0.195389263	China
208	3811	0.221666292	0.166029775	BRI papers	CN	BRI papers CN	2016	China	Others	0.049135945	0.278348126	0.214834834	China
209	4123	0.303087063	0.227231608	BRI papers	CN	BRI papers CN	2016	China	Others	0.091861768	0.278348126	0.214834834	Other/None
210	2010	0.259504714	0.353485745	BRI papers	CN	BRI papers CN	2016	China	Econs	0.067342696	0.271477928	0.195389263	China
211	1308	0.238509805	0.354410455	BRI papers	CN	BRI papers CN	2016	China	Others	0.056886927	0.278348126	0.214834834	China
212	3099	0.307944021	0.291962464	BRI papers	CN	BRI papers CN	2016	China	Econs	0.09482952	0.271477928	0.195389263	China
213	2164	0.273933347	0.166547615	BRI papers	CN	BRI papers CN	2015	China	Others	0.075039479	0.278348126	0.214834834	Other/None
214	1791	0.198908066	0.1178745	BRI papers	CN	BRI papers CN	2015	China	Others	0.039564419	0.278348126	0.214834834	China
215	7466	0.260574125	0.187276571	BRI papers	CN	BRI papers CN	2015	China	Policy/Law	0.067898875	0.283202123	0.20446591	Other/None
216	1815	0.285100905	0.261247059	BRI papers	CN	BRI papers CN	2015	China	Policy/Law	0.081282526	0.283202123	0.20446591	Other/None
217	1303	0.361760363	0.421418374	BRI papers	CN	BRI papers CN	2015	China	Policy/Law	0.13087056	0.283202123	0.20446591	China
218	2554	0.207688442	0.123333918	BRI papers	CN	BRI papers CN	2015	China	Policy/Law	0.043134489	0.283202123	0.20446591	Other/None
219	5096	0.305316388	0.137642889	BRI papers	CN	BRI papers CN	2015	China	Econs	0.093218097	0.271477928	0.195389263	China
220	4955	0.323280398	0.289929111	BRI papers	CN	BRI papers CN	2015	China	Policy/Law	0.104510216	0.283202123	0.20446591	Other/None
221	5592	0.310632621	0.249391987	BRI papers	CN	BRI papers CN	2015	China	Econs	0.096492625	0.271477928	0.195389263	Other/None
222	4782	0.300563369	0.175862207	BRI papers	CN	BRI papers CN	2015	China	Geog	0.090338339	0.255830395	0.173326439	China
223	4935	0.359091156	0.16092314	BRI papers	CN	BRI papers CN	2015	China	Econs	0.128946459	0.271477928	0.195389263	China
224	4701	0.274278823	0.22534606	BRI papers	CN	BRI papers CN	2015	China	Policy/Law	0.075228873	0.283202123	0.20446591	China
225	2808	0.243250503	0.206051415	BRI papers	CN	BRI papers CN	2015	China	Policy/Law	0.059170807	0.283202123	0.20446591	China
226	3138	0.298840746	0.2994042	BRI papers	CN	BRI papers CN	2015	China	Others	0.089305792	0.278348126	0.214834834	Other/None
227	1665	0.267172977	0.072334693	BRI papers	CN	BRI papers CN	2015	China	Geog	0.0713814	0.255830395	0.173326439	China
228	3774	0.264400132	0.228631398	BRI papers	CN	BRI papers CN	2015	China	Geog	0.06990743	0.255830395	0.173326439	China
229	1556	0.197329675	0.198815406	BRI papers	CN	BRI papers CN	2015	China	Econs	0.038939001	0.271477928	0.195389263	Other/None
230	3279	0.248301244	0.187353956	BRI papers	CN	BRI papers CN	2015	China	Policy/Law	0.061653508	0.283202123	0.20446591	Other/None
231	4465	0.296604808	0.266555469	BRI papers	CN	BRI papers CN	2015	China	Policy/Law	0.087974412	0.283202123	0.20446591	China
232	3787	0.200207905	0.125636082	BRI papers	CN	BRI papers CN	2015	China	Policy/Law	0.040083205	0.283202123	0.20446591	China
233	628	0.274004291	-0.192957442	BRI papers	CN	BRI papers CN	2015	China	Econs	0.075078351	0.271477928	0.195389263	China
234	1403	0.25689248	0.147833933	BRI papers	CN	BRI papers CN	2015	China	Policy/Law	0.065993746	0.283202123	0.20446591	Other/None
235	1186	0.231441745	0.032601031	BRI papers	CN	BRI papers CN	2015	China	Policy/Law	0.053565281	0.283202123	0.20446591	Other/None
236	4333	0.327403541	0.306439182	BRI papers	CN	BRI papers CN	2015	China	Policy/Law	0.107193079	0.283202123	0.20446591	China
237	2590	0.318428275	0.295170545	BRI papers	CN	BRI papers CN	2015	China	Others	0.101396566	0.278348126	0.214834834	China
238	1662	0.282002293	0.224971329	BRI papers	CN	BRI papers CN	2014	China	Policy/Law	0.079525293	0.283202123	0.20446591	Other/None
239	3960	0.331043258	0.199944739	BRI papers	CN	BRI papers CN	2015	China	Geog	0.109589639	0.255830395	0.173326439	Other/None
240	1765	0.285584892	0.189444043	BRI papers	CN	BRI papers CN	2017	China	Geog	0.08155873	0.255830395	0.173326439	China
241	4373	0.337156552	0.236899545	BRI papers	CN	BRI papers CN	2017	China	Others	0.113674541	0.278348126	0.214834834	China
242	7204	0.267880833	0.232886868	BRI papers	CN	BRI papers CN	2019	China	Others	0.071760141	0.278348126	0.214834834	China
243	5335	0.280953498	0.23783775	BRI papers	CN	BRI papers CN	2019	China	Econs	0.078934868	0.271477928	0.195389263	China
244	3877	0.273517856	0.289410267	BRI papers	CN	BRI papers CN	2019	China	Policy/Law	0.074812018	0.283202123	0.20446591	Other/None
245	3602	0.267604192	0.269486805	BRI papers	CN	BRI papers CN	2019	China	Econs	0.071612004	0.271477928	0.195389263	China
246	5576	0.286574846	0.232893933	BRI papers	CN	BRI papers CN	2019	China	Econs	0.082125142	0.271477928	0.195389263	China
247	2147	0.298107989	0.16004856	BRI papers	CN	BRI papers CN	2019	China	Econs	0.088868373	0.271477928	0.195389263	China
248	4505	0.243567781	0.156258277	BRI papers	CN	BRI papers CN	2019	China	Finance	0.059325264	0.305709546	0.213092737	Other/None
249	6736	0.211074348	0.190514273	BRI papers	CN	BRI papers CN	2019	China	Econs	0.04455238	0.271477928	0.195389263	China
250	3159	0.195452182	0.057991234	BRI papers	CN	BRI papers CN	2019	China	Policy/Law	0.038201556	0.283202123	0.20446591	China
251	4948	0.202343647	0.165041245	BRI papers	CN	BRI papers CN	2018	China	Others	0.040942951	0.278348126	0.214834834	Other/None
252	1243	0.335035624	0.345924793	BRI papers	CN	BRI papers CN	2019	China	Econs	0.112248869	0.271477928	0.195389263	Other/None
253	1389	0.275426363	0.225112189	BRI papers	CN	BRI papers CN	2019	China	Others	0.075859682	0.278348126	0.214834834	Other/None
254	3715	0.307631626	0.24948103	BRI papers	CN	BRI papers CN	2014	China	Others	0.094637217	0.278348126	0.214834834	China
255	6009	0.274210406	0.299259933	BRI papers	CN	BRI papers CN	2018	China	Others	0.075191347	0.278348126	0.214834834	Other/None
256	6468	0.371451049	0.399297992	BRI papers	CN	BRI papers CN	2019	China	Finance	0.137975882	0.305709546	0.213092737	Other/None
257	4909	0.321138483	0.245291078	BRI papers	CN	BRI papers CN	2019	China	Others	0.103129926	0.278348126	0.214834834	Other/None
258	4093	0.291820717	0.244561861	BRI papers	CN	BRI papers CN	2019	China	Finance	0.085159331	0.305709546	0.213092737	Other/None
259	5898	0.384009213	0.308817628	BRI papers	CN	BRI papers CN	2019	China	Econs	0.147463076	0.271477928	0.195389263	Other/None
260	1950	0.307543506	0.379587288	BRI papers	CN	BRI papers CN	2019	China	Others	0.094583008	0.278348126	0.214834834	Other/None
261	2621	0.266101582	0.223931938	BRI papers	CN	BRI papers CN	2019	China	Others	0.070810052	0.278348126	0.214834834	Other/None
262	7912	0.320132141	0.195604146	BRI papers	CN	BRI papers CN	2019	China	Geog	0.102484588	0.255830395	0.173326439	Other/None
263	1697	0.291501934	0.273865125	BRI papers	CN	BRI papers CN	2019	China	Geog	0.084973378	0.255830395	0.173326439	China
264	4270	0.327307717	0.120801141	BRI papers	CN	BRI papers CN	2019	China	Policy/Law	0.107130341	0.283202123	0.20446591	Other/None
265	2541	0.27337312	0.191227972	BRI papers	CN	BRI papers CN	2019	China	Econs	0.074732862	0.271477928	0.195389263	China
266	1179	0.242254743	0.337786362	BRI papers	CN	BRI papers CN	2019	China	Geog	0.05868736	0.255830395	0.173326439	China
267	3006	0.220636787	0.213194093	BRI papers	CN	BRI papers CN	2019	China	Policy/Law	0.048680592	0.283202123	0.20446591	China
268	6317	0.296748855	0.109737832	BRI papers	CN	BRI papers CN	2019	China	Econs	0.088059883	0.271477928	0.195389263	China
269	2488	0.278462998	0.295226945	BRI papers	CN	BRI papers CN	2019	China	Finance	0.077541641	0.305709546	0.213092737	China
270	5283	0.272550144	0.354745034	BRI papers	CN	BRI papers CN	2019	China	Finance	0.074283581	0.305709546	0.213092737	China
271	2685	0.281474976	0.230479023	BRI papers	CN	BRI papers CN	2019	China	Others	0.079228162	0.278348126	0.214834834	Other/None
272	1802	0.341381166	0.330484457	BRI papers	CN	BRI papers CN	2019	China	Geog	0.116541101	0.255830395	0.173326439	Other/None
273	1669	0.302692649	0.290675694	BRI papers	CN	BRI papers CN	2019	China	Econs	0.09162284	0.271477928	0.195389263	China
274	9605	0.2619163	0.130426187	BRI papers	CN	BRI papers CN	2018	China	Policy/Law	0.068600148	0.283202123	0.20446591	China
275	5228	0.346190759	0.173587374	BRI papers	CN	BRI papers CN	2019	China	Finance	0.119848042	0.305709546	0.213092737	China
276	4123	0.279203019	0.173762259	BRI papers	CN	BRI papers CN	2019	China	Others	0.077954326	0.278348126	0.214834834	Other/None
277	10639	0.301711375	0.148795288	BRI papers	CN	BRI papers CN	2019	China	Econs	0.091029754	0.271477928	0.195389263	China
278	3783	0.2480391	0.157530852	BRI papers	CN	BRI papers CN	2019	China	Others	0.061523395	0.278348126	0.214834834	Other/None
279	3448	0.266017599	0.230621632	BRI papers	CN	BRI papers CN	2019	China	Econs	0.070765363	0.271477928	0.195389263	Other/None
280	6754	0.354173049	0.025543508	BRI papers	CN	BRI papers CN	2019	China	Finance	0.125438549	0.305709546	0.213092737	Other/None
281	3413	0.297393254	0.312635438	BRI papers	CN	BRI papers CN	2019	China	Econs	0.088442748	0.271477928	0.195389263	Other/None
282	3279	0.260400345	0.306300599	BRI papers	CN	BRI papers CN	2019	China	Geog	0.06780834	0.255830395	0.173326439	China
283	4532	0.29314386	0.226387245	BRI papers	CN	BRI papers CN	2019	China	Econs	0.085933323	0.271477928	0.195389263	China
284	5329	0.29749545	0.265409364	BRI papers	CN	BRI papers CN	2018	China	Policy/Law	0.088503543	0.283202123	0.20446591	Other/None
285	2915	0.345094877	0.235641287	BRI papers	CN	BRI papers CN	2019	China	Econs	0.119090474	0.271477928	0.195389263	Other/None
286	3248	0.322124339	0.153861528	BRI papers	CN	BRI papers CN	2019	China	Econs	0.10376409	0.271477928	0.195389263	China
287	5210	0.295977174	0.198855246	BRI papers	CN	BRI papers CN	2018	China	Policy/Law	0.087602488	0.283202123	0.20446591	China
288	1882	0.323309536	0.184134802	BRI papers	CN	BRI papers CN	2018	China	Others	0.104529056	0.278348126	0.214834834	China
289	1721	0.326111054	0.375861789	BRI papers	CN	BRI papers CN	2018	China	Others	0.10634842	0.278348126	0.214834834	Other/None
290	2198	0.267310431	0.25689411	BRI papers	CN	BRI papers CN	2018	China	Others	0.071454867	0.278348126	0.214834834	Other/None
291	1397	0.359044962	0.452000759	BRI papers	CN	BRI papers CN	2018	China	Econs	0.128913285	0.271477928	0.195389263	China
292	2106	0.3404145	0.290278514	BRI papers	CN	BRI papers CN	2018	China	Econs	0.115882032	0.271477928	0.195389263	China
293	4100	0.233404139	0.060421088	BRI papers	CN	BRI papers CN	2018	China	Econs	0.054477492	0.271477928	0.195389263	China
294	3377	0.28359073	0.20373353	BRI papers	CN	BRI papers CN	2018	China	Policy/Law	0.080423702	0.283202123	0.20446591	China
295	5718	0.254550032	0.231231066	BRI papers	CN	BRI papers CN	2018	China	Econs	0.064795719	0.271477928	0.195389263	China
296	4103	0.343948975	0.388085291	BRI papers	CN	BRI papers CN	2018	China	Others	0.118300897	0.278348126	0.214834834	China
297	3681	0.29793436	0.088690646	BRI papers	CN	BRI papers CN	2018	China	Econs	0.088764883	0.271477928	0.195389263	China
298	5456	0.232972159	0.118484357	BRI papers	EN	BRI papers EN	2018	China	Econs	0.054276027	0.271477928	0.195389263	China
299	7325	0.306837776	-0.01091226	BRI papers	EN	BRI papers EN	2018	China	Econs	0.094149421	0.271477928	0.195389263	Other/None
300	5659	0.229894212	0.078559229	BRI papers	EN	BRI papers EN	2018	Foreign	Econs	0.052851349	0.271477928	0.195389263	Other/None
301	7084	0.221685816	0.170661085	BRI papers	EN	BRI papers EN	2018	China	Geog	0.049144601	0.255830395	0.173326439	Other/None
302	9991	0.264157007	0.179609602	BRI papers	EN	BRI papers EN	2018	Foreign	Econs	0.069778925	0.271477928	0.195389263	Other/None
303	3786	0.174286773	0.056510347	BRI papers	EN	BRI papers EN	2018	Foreign	Geog	0.030375879	0.255830395	0.173326439	Other/None
304	8492	0.289679635	0.14965123	BRI papers	EN	BRI papers EN	2018	Foreign	Geog	0.083914291	0.255830395	0.173326439	Other/None
305	7059	0.164231337	0.127214176	BRI papers	EN	BRI papers EN	2018	China	Econs	0.026971932	0.271477928	0.195389263	Other/None
306	3977	0.213884766	0.166372768	BRI papers	EN	BRI papers EN	2018	China	Econs	0.045746693	0.271477928	0.195389263	Other/None
307	7605	0.364309161	0.043766621	BRI papers	EN	BRI papers EN	2018	China	Econs	0.132721165	0.271477928	0.195389263	Other/None
308	7531	0.353325246	0.151366038	BRI papers	EN	BRI papers EN	2018	China	Policy/Law	0.124838729	0.283202123	0.20446591	Other/None
309	5140	0.227006706	0.160516887	BRI papers	EN	BRI papers EN	2018	Foreign	Policy/Law	0.051532044	0.283202123	0.20446591	Other/None
310	7452	0.223066936	0.177270862	BRI papers	EN	BRI papers EN	2018	China	Policy/Law	0.049758858	0.283202123	0.20446591	Other/None
311	7594	0.189056399	0.142599003	BRI papers	EN	BRI papers EN	2018	Foreign	Econs	0.035742322	0.271477928	0.195389263	Other/None
312	4524	0.233594792	0.093935057	BRI papers	EN	BRI papers EN	2018	Foreign	Others	0.054566527	0.278348126	0.214834834	Other/None
313	3593	0.271431393	0.146275839	BRI papers	EN	BRI papers EN	2016	China	Econs	0.073675001	0.271477928	0.195389263	Other/None
314	5188	0.310582173	-0.013507671	BRI papers	EN	BRI papers EN	2018	China	Policy/Law	0.096461286	0.283202123	0.20446591	Other/None
315	6165	0.290969021	0.065009439	BRI papers	EN	BRI papers EN	2018	Foreign	Finance	0.084662971	0.305709546	0.213092737	Other/None
316	5972	0.262384069	0.217417693	BRI papers	EN	BRI papers EN	2018	China	Others	0.0688454	0.278348126	0.214834834	Other/None
317	3484	0.31938282	0.310355238	BRI papers	EN	BRI papers EN	2015	China	Policy/Law	0.102005386	0.283202123	0.20446591	Other/None
318	5058	0.240926438	0.040857738	BRI papers	EN	BRI papers EN	2018	China	Econs	0.058045549	0.271477928	0.195389263	Other/None
319	11514	0.353135619	0.410594797	BRI papers	EN	BRI papers EN	2018	Foreign	Others	0.124704765	0.278348126	0.214834834	Other/None
320	7321	0.271032586	-0.008140584	BRI papers	EN	BRI papers EN	2018	Foreign	Others	0.073458663	0.278348126	0.214834834	Other/None
321	181	0.201669395	0.286007547	BRI papers	EN	BRI papers EN	2018	China	Geog	0.040670545	0.255830395	0.173326439	Other/None
322	10014	0.277663413	0.127873632	BRI papers	EN	BRI papers EN	2018	Foreign	Finance	0.077096971	0.305709546	0.213092737	Other/None
323	2368	0.255735673	0.225382828	BRI papers	EN	BRI papers EN	2018	Foreign	Policy/Law	0.065400734	0.283202123	0.20446591	Other/None
324	5238	0.195951146	0.155492637	BRI papers	EN	BRI papers EN	2018	China	Geog	0.038396852	0.255830395	0.173326439	Other/None
325	6064	0.233408958	0.155952598	BRI papers	EN	BRI papers EN	2018	China	Geog	0.054479742	0.255830395	0.173326439	Other/None
326	3986	0.241206103	-0.005592697	BRI papers	EN	BRI papers EN	2018	China	Geog	0.058180384	0.255830395	0.173326439	Other/None
327	5707	0.184387732	0.075119618	BRI papers	EN	BRI papers EN	2018	China	Others	0.033998836	0.278348126	0.214834834	Other/None
328	4176	0.213331861	0.164142245	BRI papers	EN	BRI papers EN	2018	China	Others	0.045510483	0.278348126	0.214834834	Other/None
329	4714	0.27037007	0.210005237	BRI papers	EN	BRI papers EN	2018	China	Policy/Law	0.073099975	0.283202123	0.20446591	Other/None
330	4584	0.239638953	0.198077919	BRI papers	EN	BRI papers EN	2018	China	Others	0.057426828	0.278348126	0.214834834	Other/None
331	3170	0.156822249	0.12902753	BRI papers	EN	BRI papers EN	2018	China	Others	0.024593218	0.278348126	0.214834834	Other/None
332	5392	0.220864106	0.109172634	BRI papers	EN	BRI papers EN	2018	China	Others	0.048780953	0.278348126	0.214834834	Other/None
333	7417	0.225670695	0.149563665	BRI papers	EN	BRI papers EN	2018	China	Econs	0.050927263	0.271477928	0.195389263	Other/None
334	8314	0.345291953	0.097016733	BRI papers	EN	BRI papers EN	2018	China	Geog	0.119226533	0.255830395	0.173326439	Other/None
335	6784	0.29395527	0.128767021	BRI papers	EN	BRI papers EN	2018	China	Geog	0.086409701	0.255830395	0.173326439	Other/None
336	6895	0.172356212	0.075372073	BRI papers	EN	BRI papers EN	2018	China	Geog	0.029706664	0.255830395	0.173326439	Other/None
337	1947	0.348826661	0.316259684	BRI papers	EN	BRI papers EN	2014	China	Others	0.121680039	0.278348126	0.214834834	China
338	1628	0.516525635	-0.231801296	BRI papers	EN	BRI papers EN	2018	China	Finance	0.266798731	0.305709546	0.213092737	Other/None
339	6384	0.282459433	0.19127191	BRI papers	EN	BRI papers EN	2018	China	Econs	0.079783331	0.271477928	0.195389263	Other/None
340	7791	0.237598546	0.002326176	BRI papers	EN	BRI papers EN	2018	Foreign	Others	0.056453069	0.278348126	0.214834834	Other/None
341	1871	0.346950477	0.316561455	BRI papers	EN	BRI papers EN	2014	Foreign	Policy/Law	0.120374633	0.283202123	0.20446591	Other/None
342	4349	0.320139825	0.39126488	BRI papers	EN	BRI papers EN	2018	China	Policy/Law	0.102489507	0.283202123	0.20446591	China
343	5709	0.206722248	0.142273495	BRI papers	EN	BRI papers EN	2018	China	Geog	0.042734088	0.255830395	0.173326439	Other/None
344	3207	0.269121601	0.115622888	BRI papers	EN	BRI papers EN	2017	China	Econs	0.072426436	0.271477928	0.195389263	Other/None
345	8004	0.184034061	0.12751345	BRI papers	EN	BRI papers EN	2017	China	Geog	0.033868535	0.255830395	0.173326439	Other/None
346	1601	0.238835083	0.262437599	BRI papers	EN	BRI papers EN	2017	China	Geog	0.057042197	0.255830395	0.173326439	Other/None
347	5700	0.186324284	0.133678414	BRI papers	EN	BRI papers EN	2017	China	Econs	0.034716739	0.271477928	0.195389263	Other/None
348	1763	0.237381824	0.308395504	BRI papers	EN	BRI papers EN	2017	China	Econs	0.05635013	0.271477928	0.195389263	Other/None
349	10308	0.242148452	0.125654238	BRI papers	EN	BRI papers EN	2017	China	Others	0.058635873	0.278348126	0.214834834	Other/None
350	2096	0.376260149	0.226237364	BRI papers	EN	BRI papers EN	2015	China	Policy/Law	0.141571699	0.283202123	0.20446591	Other/None
351	3430	0.139932897	0.116842283	BRI papers	EN	BRI papers EN	2017	China	Geog	0.019581216	0.255830395	0.173326439	Other/None
352	8724	0.315923243	0.220496345	BRI papers	EN	BRI papers EN	2017	Foreign	Finance	0.099807495	0.305709546	0.213092737	Other/None
353	8484	0.233462739	0.125118897	BRI papers	EN	BRI papers EN	2017	Foreign	Policy/Law	0.054504851	0.283202123	0.20446591	China
354	2816	0.282895805	0.120143107	BRI papers	EN	BRI papers EN	2017	Foreign	Geog	0.080030036	0.255830395	0.173326439	Other/None
355	7257	0.242632566	0.069190463	BRI papers	EN	BRI papers EN	2017	Foreign	Policy/Law	0.058870562	0.283202123	0.20446591	Other/None
356	2019	0.215540259	0.144808918	BRI papers	EN	BRI papers EN	2017	China	Geog	0.046457603	0.255830395	0.173326439	Other/None
357	6841	0.217524793	0.191203613	BRI papers	EN	BRI papers EN	2017	Foreign	Policy/Law	0.047317036	0.283202123	0.20446591	Other/None
358	6497	0.321389468	0.016211636	BRI papers	EN	BRI papers EN	2017	China	Geog	0.10329119	0.255830395	0.173326439	Other/None
359	5621	0.249959487	0.186608085	BRI papers	EN	BRI papers EN	2017	China	Geog	0.062479745	0.255830395	0.173326439	Other/None
360	5762	0.255077274	0.156148528	BRI papers	EN	BRI papers EN	2017	China	Finance	0.065064416	0.305709546	0.213092737	Other/None
361	7280	0.315869246	0.316694775	BRI papers	EN	BRI papers EN	2017	China	Policy/Law	0.09977338	0.283202123	0.20446591	Other/None
362	10205	0.259624374	0.142597818	BRI papers	EN	BRI papers EN	2017	Foreign	Policy/Law	0.067404815	0.283202123	0.20446591	Other/None
363	3927	0.270630694	0.206386654	BRI papers	EN	BRI papers EN	2017	China	Policy/Law	0.073240973	0.283202123	0.20446591	Other/None
364	7785	0.255075064	0.138225373	BRI papers	EN	BRI papers EN	2017	China	Geog	0.065063288	0.255830395	0.173326439	Other/None
365	6226	0.217651503	0.179809014	BRI papers	EN	BRI papers EN	2017	China	Geog	0.047372177	0.255830395	0.173326439	Other/None
366	6495	0.28281076	0.183948209	BRI papers	EN	BRI papers EN	2017	Foreign	Policy/Law	0.079981926	0.283202123	0.20446591	Other/None
367	5471	0.182915704	0.029346282	BRI papers	EN	BRI papers EN	2017	China	Geog	0.033458155	0.255830395	0.173326439	Other/None
368	5472	0.237283473	0.172873624	BRI papers	EN	BRI papers EN	2017	Foreign	Others	0.056303446	0.278348126	0.214834834	Other/None
369	4997	0.234706372	0.241018149	BRI papers	EN	BRI papers EN	2016	China	Others	0.055087081	0.278348126	0.214834834	Other/None
370	2920	0.252351183	0.034181244	BRI papers	EN	BRI papers EN	2016	China	Geog	0.063681119	0.255830395	0.173326439	Other/None
371	7609	0.184608689	0.118713025	BRI papers	EN	BRI papers EN	2016	China	Geog	0.034080368	0.255830395	0.173326439	Other/None
372	7367	0.189874923	0.083788305	BRI papers	EN	BRI papers EN	2016	Foreign	Econs	0.036052486	0.271477928	0.195389263	China
373	5945	0.233649931	0.054285979	BRI papers	EN	BRI papers EN	2016	China	Geog	0.05459229	0.255830395	0.173326439	Other/None
374	5002	0.260920741	0.087727717	BRI papers	EN	BRI papers EN	2016	China	Geog	0.068079633	0.255830395	0.173326439	Other/None
375	5058	0.222560237	-0.136459409	BRI papers	EN	BRI papers EN	2016	China	Geog	0.049533059	0.255830395	0.173326439	Other/None
376	6481	0.223045121	0.170150786	BRI papers	EN	BRI papers EN	2016	Foreign	Policy/Law	0.049749126	0.283202123	0.20446591	Other/None
377	5154	0.277283259	0.161729798	BRI papers	EN	BRI papers EN	2016	Foreign	Policy/Law	0.076886006	0.283202123	0.20446591	Other/None
378	6228	0.241127162	-0.03264674	BRI papers	EN	BRI papers EN	2016	China	Econs	0.058142308	0.271477928	0.195389263	Other/None
379	9552	0.252320776	0.206127516	BRI papers	EN	BRI papers EN	2019	China	Econs	0.063665774	0.271477928	0.195389263	China
380	8664	0.204605809	0.146629434	BRI papers	EN	BRI papers EN	2019	China	Econs	0.041863537	0.271477928	0.195389263	China
381	7176	0.161298291	0.103230166	BRI papers	EN	BRI papers EN	2019	China	Geog	0.026017139	0.255830395	0.173326439	China
382	7038	0.28746758	0.181349692	BRI papers	EN	BRI papers EN	2019	Foreign	Econs	0.082637609	0.271477928	0.195389263	Other/None
383	7412	0.236476069	0.092617179	BRI papers	EN	BRI papers EN	2019	China	Others	0.055920931	0.278348126	0.214834834	China
384	4290	0.195155272	0.122281576	BRI papers	EN	BRI papers EN	2019	China	Others	0.03808558	0.278348126	0.214834834	Other/None
385	7034	0.207460601	0.225591017	BRI papers	EN	BRI papers EN	2019	China	Econs	0.043039901	0.271477928	0.195389263	China
386	7572	0.270200845	0.199460744	BRI papers	EN	BRI papers EN	2019	China	Econs	0.073008496	0.271477928	0.195389263	China
387	5326	0.210986461	0.109706924	BRI papers	EN	BRI papers EN	2019	China	Geog	0.044515287	0.255830395	0.173326439	China
388	1505	0.226159257	0.184570625	BRI papers	EN	BRI papers EN	2019	Foreign	Others	0.051148009	0.278348126	0.214834834	China
389	11470	0.240789117	0.17344191	BRI papers	EN	BRI papers EN	2019	China	Econs	0.057979399	0.271477928	0.195389263	China
390	7708	0.201006232	0.141622655	BRI papers	EN	BRI papers EN	2019	China	Geog	0.040403505	0.255830395	0.173326439	China
391	5342	0.106909383	0.101008217	BRI papers	EN	BRI papers EN	2018	China	Geog	0.011429616	0.255830395	0.173326439	China
392	4795	0.372711507	-0.187398289	BRI papers	EN	BRI papers EN	2019	China	Geog	0.138913868	0.255830395	0.173326439	China
393	7074	0.262220491	0.260667336	BRI papers	EN	BRI papers EN	2019	China	Econs	0.068759586	0.271477928	0.195389263	China
394	15791	0.2345273	0.190050555	BRI papers	EN	BRI papers EN	2019	China	Econs	0.055003055	0.271477928	0.195389263	China
395	7897	0.21215065	0.16199766	BRI papers	EN	BRI papers EN	2019	China	Econs	0.045007898	0.271477928	0.195389263	China
396	14272	0.221119466	0.229692604	BRI papers	EN	BRI papers EN	2019	China	Econs	0.048893818	0.271477928	0.195389263	China
397	2251	0.225513667	0.032207964	BRI papers	EN	BRI papers EN	2019	Foreign	Geog	0.050856414	0.255830395	0.173326439	Other/None
398	7777	0.202660794	0.144738647	BRI papers	EN	BRI papers EN	2019	China	Econs	0.041071397	0.271477928	0.195389263	China
399	7295	0.176593627	0.162966902	BRI papers	EN	BRI papers EN	2019	China	Econs	0.031185309	0.271477928	0.195389263	China
400	6023	0.222961369	0.217263084	BRI papers	EN	BRI papers EN	2019	China	Others	0.049711772	0.278348126	0.214834834	China
401	9186	0.207813795	0.167735415	BRI papers	EN	BRI papers EN	2019	China	Econs	0.043186573	0.271477928	0.195389263	China
402	10594	0.150083088	0.103400966	BRI papers	EN	BRI papers EN	2019	China	Econs	0.022524933	0.271477928	0.195389263	China
403	10021	0.313863121	0.332174919	BRI papers	EN	BRI papers EN	2019	China	Geog	0.098510059	0.255830395	0.173326439	China
404	4611	0.194868312	0.111357319	BRI papers	EN	BRI papers EN	2018	China	Geog	0.037973659	0.255830395	0.173326439	China
405	7684	0.246250387	0.15081008	BRI papers	EN	BRI papers EN	2019	China	Econs	0.060639253	0.271477928	0.195389263	China
406	9017	0.208722198	0.124505128	BRI papers	EN	BRI papers EN	2019	China	Others	0.043564956	0.278348126	0.214834834	China
407	6181	0.294604825	0.177117876	BRI papers	EN	BRI papers EN	2019	China	Econs	0.086792003	0.271477928	0.195389263	China
408	7648	0.193870952	0.058742617	BRI papers	EN	BRI papers EN	2019	China	Others	0.037585946	0.278348126	0.214834834	China
409	6085	0.26610862	0.119779151	BRI papers	EN	BRI papers EN	2018	China	Econs	0.070813798	0.271477928	0.195389263	Other/None
410	8000	0.266475213	0.238543023	BRI papers	EN	BRI papers EN	2019	China	Econs	0.071009039	0.271477928	0.195389263	China
411	1258	0.271497352	0.293212459	BRI papers	EN	BRI papers EN	2019	Foreign	Econs	0.073710812	0.271477928	0.195389263	Other/None
412	9337	0.257766225	0.138144596	BRI papers	EN	BRI papers EN	2019	China	Econs	0.066443427	0.271477928	0.195389263	China
413	12951	0.198158902	0.120702948	BRI papers	EN	BRI papers EN	2019	Foreign	Geog	0.039266951	0.255830395	0.173326439	Other/None
414	5968	0.227759398	0.006830684	BRI papers	EN	BRI papers EN	2019	China	Others	0.051874343	0.278348126	0.214834834	China
415	6321	0.28111386	0.042875713	BRI papers	EN	BRI papers EN	2019	China	Others	0.079025002	0.278348126	0.214834834	China
416	5722	0.26856626	0.243597045	BRI papers	EN	BRI papers EN	2019	China	Econs	0.072127836	0.271477928	0.195389263	China
417	7236	0.315213775	0.283144545	BRI papers	EN	BRI papers EN	2019	China	Econs	0.099359724	0.271477928	0.195389263	China
418	6696	0.184158336	0.066596123	BRI papers	EN	BRI papers EN	2019	Foreign	Geog	0.033914293	0.255830395	0.173326439	Other/None
419	6753	0.211541772	0.233554927	BRI papers	EN	BRI papers EN	2018	Foreign	Policy/Law	0.044749921	0.283202123	0.20446591	Other/None
420	9192	0.22357131	0.178066715	BRI papers	EN	BRI papers EN	2019	China	Econs	0.04998413	0.271477928	0.195389263	China
421	5106	0.215718125	0.13164515	BRI papers	EN	BRI papers EN	2019	China	Econs	0.04653431	0.271477928	0.195389263	China
422	11723	0.187652503	0.109666265	BRI papers	EN	BRI papers EN	2019	Foreign	Geog	0.035213462	0.255830395	0.173326439	Other/None
423	5861	0.236933101	0.143727363	BRI papers	EN	BRI papers EN	2019	China	Others	0.056137294	0.278348126	0.214834834	China
424	6118	0.180155808	0.084701272	BRI papers	EN	BRI papers EN	2019	China	Geog	0.032456115	0.255830395	0.173326439	China
425	6403	0.265049303	0.183691202	BRI papers	EN	BRI papers EN	2019	China	Econs	0.070251133	0.271477928	0.195389263	China
426	2485	0.209973321	0.204544232	BRI papers	EN	BRI papers EN	2018	China	Geog	0.044088795	0.255830395	0.173326439	China
427	4732	0.187626712	0.11662429	BRI papers	EN	BRI papers EN	2018	China	Econs	0.035203783	0.271477928	0.195389263	Other/None
428	2622	0.270878067	0.219253483	BRI papers	EN	BRI papers EN	2018	China	Econs	0.073374927	0.271477928	0.195389263	China
429	2539	0.335216819	0.289055486	BRI papers	EN	BRI papers EN	2018	China	Finance	0.112370316	0.305709546	0.213092737	Other/None
430	2091	0.319586031	0.328464407	BRI papers	EN	BRI papers EN	2018	China	Geog	0.102135231	0.255830395	0.173326439	China
431	10892	0.265210218	0.159977267	BRI papers	EN	BRI papers EN	2018	Foreign	Policy/Law	0.07033646	0.283202123	0.20446591	Other/None
432	3705	0.202343954	-0.118849832	BRI papers	EN	BRI papers EN	2018	Foreign	Geog	0.040943076	0.255830395	0.173326439	Other/None
433	8236	0.213172136	0.165153393	BRI papers	EN	BRI papers EN	2018	China	Policy/Law	0.04544236	0.283202123	0.20446591	Other/None
434	1242	0.217482162	0.10545959	BRI papers	EN	BRI papers EN	2018	Foreign	Others	0.047298491	0.278348126	0.214834834	Other/None
435	8084	0.27052199	0.028535768	BRI papers	EN	BRI papers EN	2018	China	Econs	0.073182147	0.271477928	0.195389263	China
436	2524	0.177950585	0.159173418	BRI papers	EN	BRI papers EN	2018	China	Geog	0.031666411	0.255830395	0.173326439	China
437	4703	0.302324702	0.166095066	BRI papers	EN	BRI papers EN	2018	China	Policy/Law	0.091400225	0.283202123	0.20446591	China
438	2413	0.246588738	0.172778468	BRI papers	EN	BRI papers EN	2018	China	Geog	0.060806006	0.255830395	0.173326439	China
439	2160	0.210388151	0.118455466	BRI papers	EN	BRI papers EN	2018	Foreign	Econs	0.044263174	0.271477928	0.195389263	Other/None
440	3340	0.276643689	0.24862151	BRI papers	EN	BRI papers EN	2018	Foreign	Others	0.07653173	0.278348126	0.214834834	Other/None
441	12532	0.229847686	0.188323258	BRI papers	EN	BRI papers EN	2018	Foreign	Policy/Law	0.052829959	0.283202123	0.20446591	Other/None
	1100	0.385753799	0.159585757	BRI news	CN	BRI news CN
	518	0.186408325	0.37226151	BRI news	CN	BRI news CN
	970	0.340923654	0.363456843	BRI news	CN	BRI news CN
	574	0.329495113	0.485217679	BRI news	CN	BRI news CN
	740	0.198686407	0.272100813	BRI news	CN	BRI news CN
	641	0.290458857	0.278272595	BRI news	CN	BRI news CN
	1323	0.260621527	0.379432399	BRI news	CN	BRI news CN
	793	0.441558597	0.414645597	BRI news	CN	BRI news CN
	3353	0.25414434	0.198109639	BRI news	CN	BRI news CN
	806	0.249441812	0.335216555	BRI news	CN	BRI news CN
	795	0.246001627	0.346710216	BRI news	CN	BRI news CN
	1539	0.22197285	0.221036188	BRI news	CN	BRI news CN
	3667	0.279662083	0.227305045	BRI news	CN	BRI news CN
	973	0.276455292	0.252622304	BRI news	CN	BRI news CN
	1263	0.282799474	0.27402662	BRI news	CN	BRI news CN
	1322	0.284716083	0.278407346	BRI news	CN	BRI news CN
	2612	0.242543058	0.289859725	BRI news	CN	BRI news CN
	1023	0.323854538	0.36389569	BRI news	CN	BRI news CN
	857	0.19870797	0.253495358	BRI news	CN	BRI news CN
	1595	0.238018232	0.069267311	BRI news	CN	BRI news CN
	712	0.3026661	0.066911147	BRI news	CN	BRI news CN
	231	0.299953088	0.108306238	BRI news	CN	BRI news CN
	2020	0.2692552	0.131530895	BRI news	CN	BRI news CN
	623	0.294345437	0.075781332	BRI news	CN	BRI news CN
	892	0.216224795	0.288837621	BRI news	CN	BRI news CN
	725	0.299910251	0.414376961	BRI news	CN	BRI news CN
	4078	0.314213579	0.379600885	BRI news	CN	BRI news CN
	2429	0.272335653	0.294801707	BRI news	CN	BRI news CN
	3456	0.270707251	0.267178949	BRI news	CN	BRI news CN
	768	0.327515674	0.410092802	BRI news	CN	BRI news CN
	1401	0.394141836	0.310456973	BRI news	CN	BRI news CN
	357	0.248904271	0.278467672	BRI news	CN	BRI news CN
	745	0.45702403	0.490737071	BRI news	CN	BRI news CN
	967	0.236741788	0.190127215	BRI news	CN	BRI news CN
	411	0.310994049	0.461460024	BRI news	CN	BRI news CN
	1035	0.222762653	0.187189637	BRI news	CN	BRI news CN
	788	0.430496131	0.51274874	BRI news	CN	BRI news CN
	1171	0.281873799	0.405224828	BRI news	CN	BRI news CN
	633	0.232150242	0.222504452	BRI news	CN	BRI news CN
	909	0.409989613	0.310896773	BRI news	CN	BRI news CN
	523	0.229028728	0.145296593	BRI news	CN	BRI news CN
	522	0.229500653	0.161595854	BRI news	CN	BRI news CN
	997	0.337648322	0.383195049	BRI news	CN	BRI news CN
	1467	0.410162623	0.287859198	BRI news	CN	BRI news CN
	1024	0.232240226	0.310812831	BRI news	CN	BRI news CN
	578	0.258825425	0.439101089	BRI news	CN	BRI news CN
	1003	0.210918222	0.298695155	BRI news	CN	BRI news CN
	607	0.216733966	0.216776908	BRI news	CN	BRI news CN
	1120	0.226979585	0.269744387	BRI news	CN	BRI news CN
	739	0.207769404	0.24151821	BRI news	CN	BRI news CN
	398	0.316121428	0.287217695	BRI news	CN	BRI news CN
	1098	0.383744011	0.397485822	BRI news	CN	BRI news CN
	1863	0.247362619	0.334513341	BRI news	CN	BRI news CN
	973	0.278357544	0.167884146	BRI news	CN	BRI news CN
	718	0.298672332	0.408268709	BRI news	CN	BRI news CN
	1872	0.260373944	0.254149634	BRI news	CN	BRI news CN
	708	0.17504097	0.111175126	BRI news	CN	BRI news CN
	4040	0.229628524	0.163847336	BRI news	CN	BRI news CN
	4039	0.229521953	0.162249263	BRI news	CN	BRI news CN
	619	0.29752684	0.288275524	BRI news	CN	BRI news CN
	621	0.376232395	0.499805729	BRI news	CN	BRI news CN
	1018	0.438957274	0.496306681	BRI news	CN	BRI news CN
	2240	0.42244973	0.493608458	BRI news	CN	BRI news CN
	539	0.268363682	0.251875557	BRI news	CN	BRI news CN
	611	0.236088264	0.190350071	BRI news	CN	BRI news CN
	1176	0.345679264	0.173187584	BRI news	CN	BRI news CN
	519	0.190332981	0.244739852	BRI news	CN	BRI news CN
	1521	0.281873028	0.202423459	BRI news	CN	BRI news CN
	2150	0.291218369	0.355242546	BRI news	CN	BRI news CN
	1263	0.317231276	0.373956415	BRI news	CN	BRI news CN
	2239	0.287304164	0.356415446	BRI news	CN	BRI news CN
	2347	0.284272283	0.348105314	BRI news	CN	BRI news CN
	1234	0.214349556	0.004819074	BRI news	CN	BRI news CN
	980	0.197128763	0.023999633	BRI news	CN	BRI news CN
	947	0.296599625	0.479891514	BRI news	CN	BRI news CN
	318	0.18492702	0.595282953	BRI news	CN	BRI news CN
	221	0.420871405	0.294193997	BRI news	CN	BRI news CN
	242	0.294046293	0.423538466	BRI news	CN	BRI news CN
	2240	0.281062933	0.36101709	BRI news	CN	BRI news CN
	2677	0.349152525	0.399161609	BRI news	CN	BRI news CN
	292	0.245230212	0.288355943	BRI news	CN	BRI news CN
	863	0.251224975	0.303688102	BRI news	CN	BRI news CN
	411	0.202438669	0.060422528	BRI news	CN	BRI news CN
	723	0.34674955	0.477050293	BRI news	CN	BRI news CN
	258	0.274925737	0.343177064	BRI news	CN	BRI news CN
	966	0.218647481	0.291591893	BRI news	CN	BRI news CN
	499	0.229050381	0.224778129	BRI news	CN	BRI news CN
	721	0.219617848	0.105920176	BRI news	CN	BRI news CN
	447	0.329722253	0.330951867	BRI news	CN	BRI news CN
	365	0.435993733	0.605663409	BRI news	CN	BRI news CN
	1226	0.216683391	0.165063795	BRI news	CN	BRI news CN
	742	0.264363759	0.37426239	BRI news	CN	BRI news CN
	593	0.324113968	0.570370477	BRI news	CN	BRI news CN
	453	0.310816123	0.553945288	BRI news	CN	BRI news CN
	437	0.157548693	0.045003634	BRI news	CN	BRI news CN
	481	0.225867556	0.186086271	BRI news	CN	BRI news CN
	1742	0.283817821	0.242867731	BRI news	CN	BRI news CN
	385	0.217957827	0.321955975	BRI news	CN	BRI news CN
	567	0.373628766	0.437755186	BRI news	CN	BRI news CN
	1496	0.335852952	0.496694369	BRI news	CN	BRI news CN
	1902	0.303501252	0.26055878	BRI news	CN	BRI news CN
	2125	0.28631865	0.210999478	BRI news	CN	BRI news CN
	667	0.262606319	0.352337642	BRI news	CN	BRI news CN
	547	0.274693202	0.311797326	BRI news	CN	BRI news CN
	1859	0.230291016	0.226601563	BRI news	CN	BRI news CN
	9067	0.280484074	0.0713559	BRI news	CN	BRI news CN
	1962	0.28628783	0.16113041	BRI news	CN	BRI news CN
	1181	0.268013718	0.251248227	BRI news	CN	BRI news CN
	290	0.267884219	0.158861451	BRI news	CN	BRI news CN
	918	0.322483758	0.413211613	BRI news	CN	BRI news CN
	575	0.282765622	0.350276839	BRI news	CN	BRI news CN
	1436	0.296148899	0.315347621	BRI news	CN	BRI news CN
	468	0.211988533	0.27517582	BRI news	CN	BRI news CN
	986	0.247765489	0.036089704	BRI news	CN	BRI news CN
	3361	0.317260468	0.233963406	BRI news	CN	BRI news CN
	2071	0.311783992	0.339734744	BRI news	CN	BRI news CN
	1755	0.258569673	0.290213388	BRI news	CN	BRI news CN
	598	0.323561633	0.370843867	BRI news	CN	BRI news CN
	1755	0.303078668	0.307411352	BRI news	CN	BRI news CN
	674	0.277297587	0.286317156	BRI news	CN	BRI news CN
	975	0.478032326	0.528180197	BRI news	CN	BRI news CN
	6670	0.246710625	0.00966649	BRI news	CN	BRI news CN
	1429	0.261670857	0.334190455	BRI news	CN	BRI news CN
	726	0.290755878	0.276188797	BRI news	CN	BRI news CN
	1824	0.196393316	0.156357052	BRI news	CN	BRI news CN
	695	0.336278771	-0.148510622	BRI news	CN	BRI news CN
	593	0.2778021	0.267765719	BRI news	CN	BRI news CN
	651	0.414542606	0.425850909	BRI news	CN	BRI news CN
	488	0.344792571	0.338816842	BRI news	CN	BRI news CN
	2204	0.240845986	0.21042654	BRI news	CN	BRI news CN
	1038	0.36129053	0.336295548	BRI news	CN	BRI news CN
	1040	0.389270051	0.519866997	BRI news	CN	BRI news CN
	910	0.188008631	0.225967363	BRI news	CN	BRI news CN
	418	0.142401051	0.200816518	BRI news	CN	BRI news CN
	679	0.32722469	0.300328935	BRI news	CN	BRI news CN
	660	0.263309937	0.211919631	BRI news	CN	BRI news CN
	2205	0.282843628	0.279572176	BRI news	CN	BRI news CN
	528	0.286784408	0.277623921	BRI news	CN	BRI news CN
	647	0.283934625	0.282467078	BRI news	CN	BRI news CN
	647	0.283934625	0.282467078	BRI news	CN	BRI news CN
	834	0.231920276	0.279008329	BRI news	CN	BRI news CN
	1090	0.302177797	0.127677899	BRI news	CN	BRI news CN
	965	0.24150905	0.074412254	BRI news	CN	BRI news CN
	1868	0.270636665	0.15514894	BRI news	CN	BRI news CN
	1189	0.201265908	0.074397705	BRI news	CN	BRI news CN
	533	0.305631799	0.319256798	BRI news	CN	BRI news CN
	6516	0.262459248	0.388267613	BRI news	CN	BRI news CN
	1918	0.21155062	0.166648381	BRI news	CN	BRI news CN
	581	0.284930005	0.259536984	BRI news	CN	BRI news CN
	1784	0.221013484	0.159095001	BRI news	CN	BRI news CN
	431	0.332239105	0.303333881	BRI news	CN	BRI news CN
	1975	0.263865165	0.158913907	BRI news	CN	BRI news CN
	939	0.208146282	0.273131229	BRI news	CN	BRI news CN
	368	0.19273475	0.053084297	BRI news	CN	BRI news CN
	509	0.147261409	0.047690813	BRI news	CN	BRI news CN
	1005	0.256842776	0.07651505	BRI news	CN	BRI news CN
	881	0.381511054	0.332076744	BRI news	CN	BRI news CN
	959	0.263039324	0.386127811	BRI news	CN	BRI news CN
	704	0.285223731	0.219459778	BRI news	CN	BRI news CN
	471	0.238122575	0.278380189	BRI news	CN	BRI news CN
	1078	0.288885892	0.393037511	BRI news	CN	BRI news CN
	608	0.209774393	0.274780225	BRI news	CN	BRI news CN
	664	0.280026547	0.353770414	BRI news	CN	BRI news CN
	621	0.495356646	0.09260323	BRI news	CN	BRI news CN
	291	0.379126773	0.210172714	BRI news	CN	BRI news CN
	4474	0.391276759	0.2015292	BRI news	CN	BRI news CN
	2821	0.351488118	0.57545209	BRI news	CN	BRI news CN
	1202	0.35126437	0.505814556	BRI news	CN	BRI news CN
	532	0.288320882	0.366537974	BRI news	CN	BRI news CN
	774	0.252501923	0.299568665	BRI news	CN	BRI news CN
	2313	0.224233848	0.255325035	BRI news	CN	BRI news CN
	730	0.289522908	0.226829276	BRI news	CN	BRI news CN
	1476	0.374184485	0.190622017	BRI news	CN	BRI news CN
	1484	0.345145249	0.19001379	BRI news	CN	BRI news CN
	3365	0.287986464	0.342468928	BRI news	CN	BRI news CN
	661	0.188745559	0.187492806	BRI news	CN	BRI news CN
	497	0.300607743	0.405075816	BRI news	CN	BRI news CN
	816	0.278717921	0.277868542	BRI news	CN	BRI news CN
	659	0.213480282	0.245830447	BRI news	CN	BRI news CN
	1737	0.263233839	0.128154493	BRI news	CN	BRI news CN
	916	0.287560094	0.047672964	BRI news	CN	BRI news CN
	1025	0.335253583	0.21244467	BRI news	CN	BRI news CN
	2288	0.193160032	0.189351116	BRI news	CN	BRI news CN
	1941	0.197477523	0.21856617	BRI news	CN	BRI news CN
	1214	0.372050716	0.450702735	BRI news	CN	BRI news CN
	556	0.213991872	0.194701759	BRI news	CN	BRI news CN
	411	0.177569908	0.26738829	BRI news	CN	BRI news CN
	524	0.235680543	0.400413991	BRI news	CN	BRI news CN
	799	0.366759755	0.483508034	BRI news	CN	BRI news CN
	748	0.244617037	0.292244197	BRI news	CN	BRI news CN
	329	0.195748408	0.273840707	BRI news	CN	BRI news CN
	505	0.435343474	0.516082572	BRI news	CN	BRI news CN
	1231	0.309058066	0.039780782	BRI news	CN	BRI news CN
	2143	0.250966008	0.206722073	BRI news	CN	BRI news CN
	1875	0.281554264	0.2810488	BRI news	CN	BRI news CN
	840	0.249099407	0.271495003	BRI news	CN	BRI news CN
	651	0.315919136	-0.041753544	BRI news	CN	BRI news CN
	2021	0.283052057	0.273658408	BRI news	CN	BRI news CN
	893	0.190957757	0.31169789	BRI news	CN	BRI news CN
	2819	0.351150429	0.338000396	BRI news	CN	BRI news CN
	819	0.226053141	0.245382295	BRI news	CN	BRI news CN
	636	0.29819398	0.263159678	BRI news	CN	BRI news CN
	448	0.243469994	0.350224874	BRI news	CN	BRI news CN
	2065	0.25344924	0.270827352	BRI news	CN	BRI news CN
	416	0.249267651	0.093565885	BRI news	CN	BRI news CN
	527	0.413749636	0.415151939	BRI news	CN	BRI news CN
	568	0.263244301	0.043379656	BRI news	CN	BRI news CN
	469	0.261260442	0.332061165	BRI news	CN	BRI news CN
	396	0.31834728	0.291951866	BRI news	CN	BRI news CN
	723	0.266803485	0.173779042	BRI news	CN	BRI news CN
	2273	0.194650289	0.030946708	BRI news	EN	BRI news EN
	597	0.301803185	-0.01862214	BRI news	EN	BRI news EN
	1656	0.266361232	0.022181551	BRI news	EN	BRI news EN
	763	0.220069125	0.076890032	BRI news	EN	BRI news EN
	806	0.294503716	-0.049064074	BRI news	EN	BRI news EN
	385	0.361698567	0.02247547	BRI news	EN	BRI news EN
	649	0.276885657	0.010224608	BRI news	EN	BRI news EN
	1026	0.247903013	0.038401875	BRI news	EN	BRI news EN
	363	0.309308262	0.055050059	BRI news	EN	BRI news EN
	1416	0.327139875	0.426735958	BRI news	EN	BRI news EN
	1054	0.342980211	-0.022623267	BRI news	EN	BRI news EN
	588	0.250537988	0.089417928	BRI news	EN	BRI news EN
	560	0.256452033	-0.015395632	BRI news	EN	BRI news EN
	1043	0.277550552	0.082984427	BRI news	EN	BRI news EN
	1303	0.296306661	0.20648309	BRI news	EN	BRI news EN
	821	0.26542167	0.300006528	BRI news	EN	BRI news EN
	903	0.310345035	0.257912919	BRI news	EN	BRI news EN
	2187	0.333618392	0.369121598	BRI news	EN	BRI news EN
	1802	0.349742266	0.130898919	BRI news	EN	BRI news EN
	755	0.367655345	0.269790929	BRI news	EN	BRI news EN
	541	0.31116458	0.241868031	BRI news	EN	BRI news EN
	804	0.189106588	0.312190209	BRI news	EN	BRI news EN
	748	0.232381727	0.050422429	BRI news	EN	BRI news EN
	1150	0.247685924	0.134344037	BRI news	EN	BRI news EN
	1523	0.346151718	0.101049887	BRI news	EN	BRI news EN
	1038	0.316581612	0.162649753	BRI news	EN	BRI news EN
	1111	0.217164721	0.098229002	BRI news	EN	BRI news EN
	936	0.423927531	-0.06551578	BRI news	EN	BRI news EN
	1303	0.2995992	0.100470663	BRI news	EN	BRI news EN
	882	0.180073946	0.133161693	BRI news	EN	BRI news EN
	1072	0.260490361	0.144820405	BRI news	EN	BRI news EN
	395	0.186276151	0.167025657	BRI news	EN	BRI news EN
	2644	0.344549912	0.424291936	BRI news	EN	BRI news EN
	1404	0.249719978	0.035428974	BRI news	EN	BRI news EN
	4605	0.31020968	0.190367457	BRI news	EN	BRI news EN
	315	0.184137242	-0.062124509	BRI news	EN	BRI news EN
	462	0.293050338	0.113086678	BRI news	EN	BRI news EN
	990	0.265265481	0.055617819	BRI news	EN	BRI news EN
	631	0.293437695	0.342673661	BRI news	EN	BRI news EN
	923	0.253180781	0.120042192	BRI news	EN	BRI news EN
	1362	0.28038557	0.166132786	BRI news	EN	BRI news EN
	656	0.256254257	0.224980775	BRI news	EN	BRI news EN
	156	0.267997608	-0.093043855	BRI news	EN	BRI news EN
	811	0.193167593	0.158127128	BRI news	EN	BRI news EN
	748	0.286437902	0.224466381	BRI news	EN	BRI news EN
	1077	0.280551905	0.082116691	BRI news	EN	BRI news EN
	1644	0.285622751	0.072841824	BRI news	EN	BRI news EN
	808	0.233822998	0.222187121	BRI news	EN	BRI news EN
	934	0.201104518	0.059837188	BRI news	EN	BRI news EN
	841	0.365944656	0.010599517	BRI news	EN	BRI news EN
	967	0.21820204	0.181041186	BRI news	EN	BRI news EN
	959	0.252626259	-0.019929321	BRI news	EN	BRI news EN
	1105	0.287023451	0.066812533	BRI news	EN	BRI news EN
	790	0.376801644	0.131571125	BRI news	EN	BRI news EN
	931	0.19042533	0.113936481	BRI news	EN	BRI news EN
	1794	0.228120196	0.023628678	BRI news	EN	BRI news EN
	941	0.286555095	0.001860324	BRI news	EN	BRI news EN
	472	0.358059794	-0.140995541	BRI news	EN	BRI news EN
	1095	0.292115892	-0.006673481	BRI news	EN	BRI news EN
	559	0.245619766	0.063663688	BRI news	EN	BRI news EN
	571	0.211812308	0.043788322	BRI news	EN	BRI news EN
	529	0.198488746	0.127803711	BRI news	EN	BRI news EN
	923	0.219961433	0.155026665	BRI news	EN	BRI news EN
	969	0.23821995	0.035440256	BRI news	EN	BRI news EN
	915	0.167551548	0.008121663	BRI news	EN	BRI news EN
	535	0.346892527	0.160754006	BRI news	EN	BRI news EN
	865	0.215143946	0.263236282	BRI news	EN	BRI news EN
	1029	0.236590502	0.172451819	BRI news	EN	BRI news EN
	614	0.306561816	0.330439791	BRI news	EN	BRI news EN
	1132	0.235013302	0.162448921	BRI news	EN	BRI news EN
	1077	0.255407882	0.294487025	BRI news	EN	BRI news EN
	875	0.344500279	0.400522204	BRI news	EN	BRI news EN
	485	0.286773187	0.135328205	BRI news	EN	BRI news EN
	389	0.359612023	0.421895682	BRI news	EN	BRI news EN
	1015	0.263329709	0.118908024	BRI news	EN	BRI news EN
	1035	0.25257392	0.098865711	BRI news	EN	BRI news EN
	472	0.291134652	0.338901678	BRI news	EN	BRI news EN
	325	0.237097562	0.410931908	BRI news	EN	BRI news EN
	1184	0.206551458	0.058228096	BRI news	EN	BRI news EN
	1042	0.31376126	0.128251794	BRI news	EN	BRI news EN
	965	0.149011497	-0.131959484	BRI news	EN	BRI news EN
	1005	0.279741931	0.392386357	BRI news	EN	BRI news EN
	679	0.27674584	0.201832207	BRI news	EN	BRI news EN
	755	0.219850116	-0.105609547	BRI news	EN	BRI news EN
	3003	0.391828888	0.079835206	BRI news	EN	BRI news EN
	917	0.268752158	0.019742718	BRI news	EN	BRI news EN
	748	0.28039389	0.351916271	BRI news	EN	BRI news EN
	584	0.290515668	0.196375897	BRI news	EN	BRI news EN
	3649	0.25183408	0.146376599	BRI news	EN	BRI news EN
	722	0.278715657	0.346670466	BRI news	EN	BRI news EN
	1283	0.238820161	0.104174179	BRI news	EN	BRI news EN
	614	0.345324044	0.051582136	BRI news	EN	BRI news EN
	1485	0.251659198	0.090170944	BRI news	EN	BRI news EN
	733	0.223486357	0.1570526	BRI news	EN	BRI news EN
	557	0.225516034	0.120689943	BRI news	EN	BRI news EN
	447	0.300106025	0.081342608	BRI news	EN	BRI news EN
	925	0.298572033	-0.026338644	BRI news	EN	BRI news EN
	1041	0.270062412	0.199737031	BRI news	EN	BRI news EN
	660	0.282665017	-0.095178116	BRI news	EN	BRI news EN
	771	0.413901799	-0.010557122	BRI news	EN	BRI news EN
	491	0.236490109	-0.101392763	BRI news	EN	BRI news EN
	1028	0.317772536	0.01852708	BRI news	EN	BRI news EN
	981	0.312009871	0.079982383	BRI news	EN	BRI news EN
	405	0.246289463	0.177047275	BRI news	EN	BRI news EN
	860	0.282244996	0.000545	BRI news	EN	BRI news EN
	1004	0.359043593	0.053570415	BRI news	EN	BRI news EN
	3188	0.312566934	0.08900303	BRI news	EN	BRI news EN
	1344	0.203802832	0.061278836	BRI news	EN	BRI news EN
	777	0.297851583	0.292422557	BRI news	EN	BRI news EN
	310	0.191783941	0.269917991	BRI news	EN	BRI news EN
	483	0.258841941	0.046370455	BRI news	EN	BRI news EN
	710	0.416481164	0.362937379	BRI news	EN	BRI news EN
	665	0.281032158	-0.071451744	BRI news	EN	BRI news EN
	1690	0.286677807	-0.025305686	BRI news	EN	BRI news EN
	912	0.264993281	0.035532221	BRI news	EN	BRI news EN
	1064	0.268693472	0.174386232	BRI news	EN	BRI news EN
	447	0.301030833	0.271731805	BRI news	EN	BRI news EN
	931	0.287557197	0.030273724	BRI news	EN	BRI news EN
	518	0.206789011	0.147357931	BRI news	EN	BRI news EN
	1121	0.194900327	0.149172581	BRI news	EN	BRI news EN
	669	0.205604302	0.281312301	BRI news	EN	BRI news EN
	321	0.404672952	-0.016684151	BRI news	EN	BRI news EN
	555	0.274533152	0.241395642	BRI news	EN	BRI news EN
	790	0.26947543	-0.041138462	BRI news	EN	BRI news EN
	567	0.206663335	-0.020610038	BRI news	EN	BRI news EN
	409	0.286047877	0.055794377	BRI news	EN	BRI news EN
	427	0.241223209	-0.016012817	BRI news	EN	BRI news EN
	608	0.255942463	-0.075161569	BRI news	EN	BRI news EN
	940	0.273189951	0.487076866	BRI news	EN	BRI news EN
	735	0.208257811	0.205394894	BRI news	EN	BRI news EN
	1436	0.297386092	0.140150469	BRI news	EN	BRI news EN
	388	0.210296192	0.014373904	BRI news	EN	BRI news EN
	408	0.247697738	-0.057034592	BRI news	EN	BRI news EN
	537	0.282591284	0.23500281	BRI news	EN	BRI news EN
	1011	0.244989491	0.182703188	BRI news	EN	BRI news EN
	437	0.283846519	0.202343095	BRI news	EN	BRI news EN
	691	0.290713449	0.09082013	BRI news	EN	BRI news EN
	169	0.170339498	-0.030155883	BRI news	EN	BRI news EN
	1559	0.364229812	0.167211069	BRI news	EN	BRI news EN
	1852	0.296201664	0.303830963	BRI news	EN	BRI news EN
	1713	0.202684473	0.04370191	BRI news	EN	BRI news EN
	12031	0.197914052	0.136970162	Oil palm papers	EN	Oil palm papers EN
	15655	0.194343534	0.139370311	Oil palm papers	EN	Oil palm papers EN
	11147	0.143272431	0.125811823	Oil palm papers	EN	Oil palm papers EN
	6778	0.130280581	0.035963398	Oil palm papers	EN	Oil palm papers EN
	7309	0.140368499	0.054609637	Oil palm papers	EN	Oil palm papers EN
	5204	0.175641257	0.151717236	Oil palm papers	EN	Oil palm papers EN
	6775	0.175397108	0.110006781	Oil palm papers	EN	Oil palm papers EN
	10909	0.171012418	0.11868757	Oil palm papers	EN	Oil palm papers EN
	10924	0.157433635	0.088391388	Oil palm papers	EN	Oil palm papers EN
	16076	0.173961027	0.11951364	Oil palm papers	EN	Oil palm papers EN
	5968	0.184067648	0.084906507	Oil palm papers	EN	Oil palm papers EN
	9768	0.173103562	0.10542419	Oil palm papers	EN	Oil palm papers EN
	5069	0.199096547	0.148842392	Oil palm papers	EN	Oil palm papers EN
	7281	0.137320833	0.09074471	Oil palm papers	EN	Oil palm papers EN
	7644	0.254529805	0.27824683	Oil palm papers	EN	Oil palm papers EN
	4286	0.254467303	0.15871294	Oil palm papers	EN	Oil palm papers EN
	7636	0.156493213	0.048628435	Oil palm papers	EN	Oil palm papers EN
	7381	0.230389215	0.201687834	Oil palm papers	EN	Oil palm papers EN
	7744	0.190504763	0.062786786	Oil palm papers	EN	Oil palm papers EN
	4231	0.135068261	0.10969331	Oil palm papers	EN	Oil palm papers EN
	13439	0.185665137	0.135740061	Oil palm papers	EN	Oil palm papers EN
	10135	0.152838372	0.050580079	Oil palm papers	EN	Oil palm papers EN
	4841	0.157702191	0.158897507	Oil palm papers	EN	Oil palm papers EN
	8120	0.171229945	0.059641084	Oil palm papers	EN	Oil palm papers EN
	8896	0.17740647	0.14707782	Oil palm papers	EN	Oil palm papers EN
	12025	0.18956829	0.179849857	Oil palm papers	EN	Oil palm papers EN
	9086	0.230010242	0.196318539	Oil palm papers	EN	Oil palm papers EN
	9296	0.149350693	0.041098888	Oil palm papers	EN	Oil palm papers EN
	12640	0.229935155	0.01566497	Oil palm papers	EN	Oil palm papers EN
	4850	0.216926388	0.174479645	Oil palm papers	EN	Oil palm papers EN
	14244	0.200910632	0.12360088	Oil palm papers	EN	Oil palm papers EN
	5117	0.217940644	0.198149863	Oil palm papers	EN	Oil palm papers EN
	8913	0.226762044	0.221188809	Oil palm papers	EN	Oil palm papers EN
	12689	0.257572382	0.202550644	Oil palm papers	EN	Oil palm papers EN
	10114	0.156206607	0.105888865	Oil palm papers	EN	Oil palm papers EN
	13013	0.169507866	0.134002284	Oil palm papers	EN	Oil palm papers EN
	7979	0.138980762	0.116194588	Oil palm papers	EN	Oil palm papers EN
	6905	0.157897121	0.103000925	Oil palm papers	EN	Oil palm papers EN
	9743	0.163166298	0.090627521	Oil palm papers	EN	Oil palm papers EN
	5896	0.193560764	-0.005359534	Oil palm papers	EN	Oil palm papers EN
	3265	0.22339534	0.110662208	Oil palm papers	EN	Oil palm papers EN
	7849	0.135016567	0.072061419	Oil palm papers	EN	Oil palm papers EN
	7622	0.271396691	0.194361244	Oil palm papers	EN	Oil palm papers EN
	11922	0.193046766	0.128988121	Oil palm papers	EN	Oil palm papers EN
	7312	0.1694483	0.099332442	Oil palm papers	EN	Oil palm papers EN
	10221	0.16661926	0.157125726	Oil palm papers	EN	Oil palm papers EN
	9329	0.142433977	0.092374577	Oil palm papers	EN	Oil palm papers EN
	11760	0.177811287	0.12969711	Oil palm papers	EN	Oil palm papers EN
	9263	0.190487175	0.110421207	Oil palm papers	EN	Oil palm papers EN
	9148	0.154934265	0.128319968	Oil palm papers	EN	Oil palm papers EN
	6387	0.172988363	0.104054205	Oil palm papers	EN	Oil palm papers EN
	7165	0.212536014	-0.002298388	Oil palm papers	EN	Oil palm papers EN
	4054	0.194331032	0.045451281	Oil palm papers	EN	Oil palm papers EN
	5601	0.197532768	0.12340005	Oil palm papers	EN	Oil palm papers EN
	8074	0.175365386	0.123008768	Oil palm papers	EN	Oil palm papers EN
	8430	0.181254322	0.123587794	Oil palm papers	EN	Oil palm papers EN
	11313	0.207405358	0.176878233	Oil palm papers	EN	Oil palm papers EN
	6137	0.21840193	0.147617413	Oil palm papers	EN	Oil palm papers EN
	6748	0.159045242	0.046608857	Oil palm papers	EN	Oil palm papers EN
	8271	0.173042234	0.132963767	Oil palm papers	EN	Oil palm papers EN
	5418	0.238114119	0.190763982	Oil palm papers	EN	Oil palm papers EN
	7276	0.183481106	0.128089743	Oil palm papers	EN	Oil palm papers EN
	8203	0.17560046	0.136198978	Oil palm papers	EN	Oil palm papers EN
	10279	0.187694546	0.110628194	Oil palm papers	EN	Oil palm papers EN
	6553	0.150066534	0.083517084	Oil palm papers	EN	Oil palm papers EN
	12412	0.169886929	0.068233188	Oil palm papers	EN	Oil palm papers EN
	9029	0.163114988	0.091353407	Oil palm papers	EN	Oil palm papers EN
	9442	0.213871766	0.19391774	Oil palm papers	EN	Oil palm papers EN
	5753	0.151628801	0.098195925	Oil palm papers	EN	Oil palm papers EN
	10412	0.221114342	0.174833324	Oil palm papers	EN	Oil palm papers EN
	6050	0.155099157	0.081709303	Oil palm papers	EN	Oil palm papers EN
	6262	0.171854244	0.136175997	Oil palm papers	EN	Oil palm papers EN
	5109	0.165324578	0.069862531	Oil palm papers	EN	Oil palm papers EN
	8974	0.163821699	0.102234029	Oil palm papers	EN	Oil palm papers EN
	8964	0.171386135	0.120236701	Oil palm papers	EN	Oil palm papers EN
	11849	0.197749432	0.155958177	Oil palm papers	EN	Oil palm papers EN
	14708	0.154221918	0.167958504	Oil palm papers	EN	Oil palm papers EN
	5188	0.163805454	0.159070941	Oil palm papers	EN	Oil palm papers EN
	5519	0.175904949	0.10928624	Oil palm papers	EN	Oil palm papers EN
	4563	0.154304951	0.102246831	Oil palm papers	EN	Oil palm papers EN
	2707	0.219875413	0.104426068	Oil palm papers	EN	Oil palm papers EN
	6024	0.190180414	0.132116149	Oil palm papers	EN	Oil palm papers EN
	12459	0.193513154	0.137334469	Oil palm papers	EN	Oil palm papers EN
	5442	0.168056114	0.062619425	Oil palm papers	EN	Oil palm papers EN
	3372	0.195211587	0.078698199	Oil palm papers	EN	Oil palm papers EN
	9179	0.24073869	0.258868714	Oil palm papers	EN	Oil palm papers EN
	3273	0.199759963	0.127649707	Oil palm papers	EN	Oil palm papers EN
	10891	0.213495849	0.187116085	Oil palm papers	EN	Oil palm papers EN
	8554	0.173897865	0.121238182	Oil palm papers	EN	Oil palm papers EN
	8884	0.194134282	0.157515619	Oil palm papers	EN	Oil palm papers EN
	6753	0.234239922	0.044438243	Oil palm papers	EN	Oil palm papers EN
	6578	0.150106782	0.005697534	Oil palm papers	EN	Oil palm papers EN
	3533	0.114784951	0.06999218	Oil palm papers	EN	Oil palm papers EN
	11754	0.191763292	0.043137995	Oil palm papers	EN	Oil palm papers EN
	5951	0.17317756	0.139435381	Oil palm papers	EN	Oil palm papers EN
	9536	0.165686683	0.075875625	Oil palm papers	EN	Oil palm papers EN
	7267	0.195477637	0.140748467	Oil palm papers	EN	Oil palm papers EN
	3689	0.301528224	0.205222492	Oil palm papers	EN	Oil palm papers EN
	10276	0.238460623	0.154896164	Oil palm papers	EN	Oil palm papers EN
	8244	0.189958416	0.134895827	Oil palm papers	EN	Oil palm papers EN
	5988	0.178703733	0.110357158	Oil palm papers	EN	Oil palm papers EN
	6893	0.145645793	0.059343926	Oil palm papers	EN	Oil palm papers EN
	7926	0.193813582	0.141250956	Oil palm papers	EN	Oil palm papers EN
	12162	0.192927684	0.144278098	Oil palm papers	EN	Oil palm papers EN
	9431	0.168085577	0.070639529	Oil palm papers	EN	Oil palm papers EN
	12528	0.198425063	0.144294288	Oil palm papers	EN	Oil palm papers EN
	6404	0.209498577	0.162749718	Oil palm papers	EN	Oil palm papers EN
	7840	0.164493851	0.114558952	Oil palm papers	EN	Oil palm papers EN
	8014	0.183911867	0.103089562	Oil palm papers	EN	Oil palm papers EN
	4174	0.162467572	-0.040506714	Oil palm papers	EN	Oil palm papers EN
	5952	0.158540217	-0.005662956	Oil palm papers	EN	Oil palm papers EN
	7189	0.199959031	0.012096313	Oil palm papers	EN	Oil palm papers EN
	8748	0.184192063	0.180886087	Oil palm papers	EN	Oil palm papers EN
	6860	0.164632164	0.130776894	Oil palm papers	EN	Oil palm papers EN
	7666	0.202932951	0.010822262	Oil palm papers	EN	Oil palm papers EN
	9681	0.170507704	0.093291314	Oil palm papers	EN	Oil palm papers EN
	7712	0.153569225	0.144652671	Oil palm papers	EN	Oil palm papers EN
	6658	0.137661337	0.087641542	Oil palm papers	EN	Oil palm papers EN
	6760	0.197530119	0.10278715	Oil palm papers	EN	Oil palm papers EN
	4527	0.209379104	0.086339476	Oil palm papers	EN	Oil palm papers EN
	7326	0.182811988	0.074795404	Oil palm papers	EN	Oil palm papers EN
	7876	0.178892852	0.013712067	Oil palm papers	EN	Oil palm papers EN
	5415	0.191859506	0.191173271	Oil palm papers	EN	Oil palm papers EN
	5375	0.246501267	0.112092187	Oil palm papers	EN	Oil palm papers EN
	7513	0.206659861	0.067706797	Oil palm papers	EN	Oil palm papers EN
	7914	0.200148309	0.136494511	Oil palm papers	EN	Oil palm papers EN
	9479	0.184939515	0.126630054	Oil palm papers	EN	Oil palm papers EN
	5978	0.16919205	0.088058381	Oil palm papers	EN	Oil palm papers EN
	7251	0.154556813	0.117914905	Oil palm papers	EN	Oil palm papers EN
	5777	0.207610208	0.106772541	Oil palm papers	EN	Oil palm papers EN
	6972	0.174224464	0.123525559	Oil palm papers	EN	Oil palm papers EN
	6670	0.141863431	0.068541527	Oil palm papers	EN	Oil palm papers EN
	2849	0.217717721	0.014724574	Oil palm papers	EN	Oil palm papers EN
	10447	0.175661246	0.138435406	Oil palm papers	EN	Oil palm papers EN
	9872	0.183192591	0.112940436	Oil palm papers	EN	Oil palm papers EN
	9709	0.14166813	0.099998702	Oil palm papers	EN	Oil palm papers EN
	10899	0.132334305	0.102598191	Oil palm papers	EN	Oil palm papers EN
	10433	0.153802267	0.097583701	Oil palm papers	EN	Oil palm papers EN
	7917	0.242397007	0.217119259	Oil palm papers	EN	Oil palm papers EN
	5116	0.209945649	0.033613459	Oil palm papers	EN	Oil palm papers EN
	5380	0.188825007	0.206544843	Oil palm papers	EN	Oil palm papers EN
	12304	0.139216598	0.099827323	Oil palm papers	EN	Oil palm papers EN
	11295	0.15769166	0.091961363	Oil palm papers	EN	Oil palm papers EN
	5409	0.174556067	0.032948088	Oil palm papers	EN	Oil palm papers EN
	8217	0.14951361	0.120794052	Oil palm papers	EN	Oil palm papers EN
	3901	0.146722707	0.131431553	Oil palm papers	EN	Oil palm papers EN
	4688	0.187823282	0.133290836	Oil palm papers	EN	Oil palm papers EN
	3277	0.188730416	0.129223045	Oil palm papers	EN	Oil palm papers EN
	8400	0.191371069	0.176862316	Oil palm papers	EN	Oil palm papers EN
	7513	0.252121929	0.197398863	Oil palm papers	EN	Oil palm papers EN
	6093	0.150403428	0.044603706	Oil palm papers	EN	Oil palm papers EN
	5706	0.238171445	0.229508072	Oil palm papers	EN	Oil palm papers EN
	6819	0.210278554	0.092267762	Oil palm papers	EN	Oil palm papers EN
	7369	0.24289032	0.174736947	Oil palm papers	EN	Oil palm papers EN
	8760	0.181272506	0.176428077	Oil palm papers	EN	Oil palm papers EN
	7076	0.144895106	0.041034332	Oil palm papers	EN	Oil palm papers EN
	5241	0.22051561	0.144937231	Oil palm papers	EN	Oil palm papers EN
	9862	0.14850657	0.082781523	Oil palm papers	EN	Oil palm papers EN
	6575	0.143023854	0.121377088	Oil palm papers	EN	Oil palm papers EN
	7279	0.164018849	0.118077643	Oil palm papers	EN	Oil palm papers EN
	3797	0.207124174	0.113270596	Oil palm papers	EN	Oil palm papers EN
	3674	0.168099042	0.129828378	Oil palm papers	EN	Oil palm papers EN
	11061	0.1866088	0.109316342	Oil palm papers	EN	Oil palm papers EN
	6408	0.174086018	0.083153671	Oil palm papers	EN	Oil palm papers EN
	10866	0.193020623	0.153836999	Oil palm papers	EN	Oil palm papers EN
	10995	0.204623207	0.11541256	Oil palm papers	EN	Oil palm papers EN
	7056	0.19177842	0.112138634	Oil palm papers	EN	Oil palm papers EN
	6143	0.164095937	0.101997034	Oil palm papers	EN	Oil palm papers EN
	7878	0.175257804	0.093117675	Oil palm papers	EN	Oil palm papers EN
	8486	0.170591345	0.105662559	Oil palm papers	EN	Oil palm papers EN
	6069	0.170716479	0.08511933	Oil palm papers	EN	Oil palm papers EN
	2638	0.185081193	0.091011501	Oil palm papers	EN	Oil palm papers EN
	2752	0.194825144	0.159339756	Oil palm papers	EN	Oil palm papers EN
	11691	0.202157829	0.109878676	Oil palm papers	EN	Oil palm papers EN
	9013	0.119978039	0.024344351	Oil palm papers	EN	Oil palm papers EN
	10777	0.212454472	0.172064015	Oil palm papers	EN	Oil palm papers EN
	4491	0.262704584	0.033238293	Oil palm papers	EN	Oil palm papers EN
	226	0.132905522	0.192423641	Oil palm papers	EN	Oil palm papers EN
	7659	0.226626084	0.173407466	Oil palm papers	EN	Oil palm papers EN
	3477	0.177584898	0.057925886	Oil palm papers	EN	Oil palm papers EN
	7757	0.145993937	0.122798996	Oil palm papers	EN	Oil palm papers EN
	7975	0.19236253	0.153143631	Oil palm papers	EN	Oil palm papers EN
	5314	0.158205578	0.167837189	Oil palm papers	EN	Oil palm papers EN
	5897	0.17445535	0.027631607	Oil palm papers	EN	Oil palm papers EN
	6334	0.174480404	0.04648888	Oil palm papers	EN	Oil palm papers EN
	9294	0.156989153	0.029579989	Oil palm papers	EN	Oil palm papers EN
	10847	0.164185493	0.146238533	Oil palm papers	EN	Oil palm papers EN
	11969	0.237982969	0.160830454	Oil palm papers	EN	Oil palm papers EN
	11301	0.17979765	0.056324207	Oil palm papers	EN	Oil palm papers EN
	9539	0.17043358	0.131329808	Oil palm papers	EN	Oil palm papers EN
	5534	0.211263546	0.074761804	Oil palm papers	EN	Oil palm papers EN
	4475	0.161495777	0.062420967	Oil palm papers	EN	Oil palm papers EN
	7494	0.169127383	0.099358308	Oil palm papers	EN	Oil palm papers EN
	8088	0.185336524	0.184636469	Oil palm papers	EN	Oil palm papers EN
	9387	0.222726934	0.16528692	Oil palm papers	EN	Oil palm papers EN
	4097	0.213115213	0.053462601	Oil palm papers	EN	Oil palm papers EN
	3546	0.20583917	0.120554263	Oil palm papers	EN	Oil palm papers EN
	10170	0.2234476	0.093755898	Oil palm papers	EN	Oil palm papers EN
	14153	0.190192491	0.139813476	Oil palm papers	EN	Oil palm papers EN
	7202	0.124689834	0.036039534	Oil palm papers	EN	Oil palm papers EN
	9051	0.203084423	0.174588073	Oil palm papers	EN	Oil palm papers EN
	8154	0.17516851	0.120678236	Oil palm papers	EN	Oil palm papers EN
	4974	0.129715968	0.149447572	Oil palm papers	EN	Oil palm papers EN
	9299	0.130323017	0.081909374	Oil palm papers	EN	Oil palm papers EN
	8044	0.2299091	0.110915297	Oil palm papers	EN	Oil palm papers EN
	4353	0.212872932	0.144606467	Oil palm papers	EN	Oil palm papers EN
	9881	0.190379683	0.198442501	Oil palm papers	EN	Oil palm papers EN
	5111	0.160078593	0.106527836	Oil palm papers	EN	Oil palm papers EN
	6015	0.165375938	0.11264304	Oil palm papers	EN	Oil palm papers EN
	8270	0.182383875	0.072907502	Oil palm papers	EN	Oil palm papers EN
	10229	0.239453002	0.211557816	Oil palm papers	EN	Oil palm papers EN
	8064	0.217830152	0.125412664	Oil palm papers	EN	Oil palm papers EN
	6260	0.138149936	0.063586188	Oil palm papers	EN	Oil palm papers EN
	12897	0.229420541	0.094256925	Oil palm papers	EN	Oil palm papers EN
	9785	0.224986831	0.177912937	Oil palm papers	EN	Oil palm papers EN
	15608	0.200508672	0.036507611	Oil palm papers	EN	Oil palm papers EN
	12495	0.174769515	0.114129104	Oil palm papers	EN	Oil palm papers EN
	8381	0.187869101	0.061920865	Oil palm papers	EN	Oil palm papers EN
	8775	0.158497084	0.113715349	Oil palm papers	EN	Oil palm papers EN
	5650	0.073799126	0.047530434	Oil palm papers	EN	Oil palm papers EN
	8123	0.218520278	0.133649821	Oil palm papers	EN	Oil palm papers EN
	7234	0.173553966	0.131237407	Oil palm papers	EN	Oil palm papers EN
	9928	0.176964493	0.114555004	Oil palm papers	EN	Oil palm papers EN
	13265	0.187932918	0.069415328	Oil palm papers	EN	Oil palm papers EN
	10070	0.167756796	0.118325818	Oil palm papers	EN	Oil palm papers EN
	2823	0.156090223	0.109822984	Oil palm papers	EN	Oil palm papers EN
	6291	0.171687049	0.093287853	Oil palm papers	EN	Oil palm papers EN
	11321	0.162081029	0.117818089	Oil palm papers	EN	Oil palm papers EN
	8347	0.158689861	0.120006404	Oil palm papers	EN	Oil palm papers EN
	6531	0.163756187	0.089559513	Oil palm papers	EN	Oil palm papers EN
	324	0.121871205	0.168288717	Oil palm papers	EN	Oil palm papers EN
	9846	0.145216476	0.135231172	Oil palm papers	EN	Oil palm papers EN
	5848	0.163150424	0.075254593	Oil palm papers	EN	Oil palm papers EN
	9025	0.210687947	0.18661156	Oil palm papers	EN	Oil palm papers EN
	5356	0.184703441	0.108942968	Oil palm papers	EN	Oil palm papers EN
	11455	0.170664883	0.027048542	Oil palm papers	EN	Oil palm papers EN
	9381	0.178969036	0.032172631	Oil palm papers	EN	Oil palm papers EN
	7055	0.195473639	0.149387805	Oil palm papers	EN	Oil palm papers EN
	5995	0.170022707	0.126904754	Oil palm papers	EN	Oil palm papers EN
	9890	0.192986735	-0.044466988	Oil palm papers	EN	Oil palm papers EN
	8223	0.161587437	0.127398479	Oil palm papers	EN	Oil palm papers EN
	9843	0.191633241	0.132587124	Oil palm papers	EN	Oil palm papers EN
	10203	0.165173219	0.1187785	Oil palm papers	EN	Oil palm papers EN
	5493	0.180852193	0.113426736	Oil palm papers	EN	Oil palm papers EN
	6753	0.207896102	0.089023179	Oil palm papers	EN	Oil palm papers EN
	9250	0.190210534	0.079778548	Oil palm papers	EN	Oil palm papers EN
	11191	0.158037116	0.054467379	Oil palm papers	EN	Oil palm papers EN
	7206	0.155219039	0.107794909	Oil palm papers	EN	Oil palm papers EN
	8939	0.149017926	0.102329354	Oil palm papers	EN	Oil palm papers EN
	6491	0.183835342	0.120520295	Oil palm papers	EN	Oil palm papers EN
	7097	0.172678831	0.106480163	Oil palm papers	EN	Oil palm papers EN
	7822	0.224281638	0.106276077	Oil palm papers	EN	Oil palm papers EN
	8130	0.198080291	0.030104579	Oil palm papers	EN	Oil palm papers EN
	4474	0.16352468	0.196917533	Oil palm papers	EN	Oil palm papers EN
	10007	0.20576599	0.088256408	Oil palm papers	EN	Oil palm papers EN
	12291	0.21124358	0.192394809	Oil palm papers	EN	Oil palm papers EN
	13530	0.223320799	0.178606392	Oil palm papers	EN	Oil palm papers EN
	6847	0.163403497	0.147021334	Oil palm papers	EN	Oil palm papers EN
	4312	0.092701002	0.080024896	Oil palm papers	EN	Oil palm papers EN
	9814	0.176273922	0.066456691	Oil palm papers	EN	Oil palm papers EN
	12665	0.244646691	0.101396317	Oil palm papers	EN	Oil palm papers EN
	4192	0.182189049	0.051234592	Oil palm papers	EN	Oil palm papers EN
	10089	0.176017196	0.13920552	Oil palm papers	EN	Oil palm papers EN
	10334	0.183768811	0.145225512	Oil palm papers	EN	Oil palm papers EN
	9114	0.186965519	0.139239955	Oil palm papers	EN	Oil palm papers EN
	3461	0.141802525	0.01917919	Oil palm papers	EN	Oil palm papers EN
	8842	0.170035315	0.141029617	Oil palm papers	EN	Oil palm papers EN
	4549	0.132410643	0.114325876	Oil palm papers	EN	Oil palm papers EN
	8991	0.190153681	0.102858779	Oil palm papers	EN	Oil palm papers EN
	9201	0.163891538	0.115411926	Oil palm papers	EN	Oil palm papers EN
	9046	0.207144426	0.144521427	Oil palm papers	EN	Oil palm papers EN
	8163	0.208861968	0.183071307	Oil palm papers	EN	Oil palm papers EN
	9949	0.181466026	0.071906555	Oil palm papers	EN	Oil palm papers EN
	8276	0.187700791	0.039168622	Oil palm papers	EN	Oil palm papers EN
	8943	0.19940286	0.210931	Oil palm papers	EN	Oil palm papers EN
	2823	0.207016906	0.156948288	Oil palm papers	EN	Oil palm papers EN
	10703	0.156321814	0.076569667	Oil palm papers	EN	Oil palm papers EN
	7980	0.138264852	0.099645324	Oil palm papers	EN	Oil palm papers EN
	17230	0.168491639	0.135766912	Oil palm papers	EN	Oil palm papers EN
	5790	0.159236326	0.069012636	Oil palm papers	EN	Oil palm papers EN
	9239	0.217914742	0.130296647	Oil palm papers	EN	Oil palm papers EN
	11859	0.176528761	0.090418114	Oil palm papers	EN	Oil palm papers EN
	5840	0.172766755	0.059169861	Oil palm papers	EN	Oil palm papers EN
	8850	0.167365514	0.165308311	Oil palm papers	EN	Oil palm papers EN
	6537	0.138419469	0.117492584	Oil palm papers	EN	Oil palm papers EN
	6365	0.192268619	0.078224691	Oil palm papers	EN	Oil palm papers EN
	6450	0.161234921	0.097926818	Oil palm papers	EN	Oil palm papers EN
	7091	0.164545196	0.073738922	Oil palm papers	EN	Oil palm papers EN
	6985	0.166523829	0.120374567	Oil palm papers	EN	Oil palm papers EN
	8376	0.203325379	0.129560748	Oil palm papers	EN	Oil palm papers EN
	5797	0.202043668	0.175997656	Oil palm papers	EN	Oil palm papers EN
	9947	0.174868323	0.076292602	Oil palm papers	EN	Oil palm papers EN
	3257	0.188800277	0.100824012	Oil palm papers	EN	Oil palm papers EN
	7495	0.180477812	0.155493332	Oil palm papers	EN	Oil palm papers EN
	4062	0.246380874	0.182663992	Oil palm papers	EN	Oil palm papers EN
	8797	0.199986825	0.196662424	Oil palm papers	EN	Oil palm papers EN
	3759	0.153473206	-0.018846392	Oil palm papers	EN	Oil palm papers EN
	1595	0.144158268	0.124888557	Oil palm papers	EN	Oil palm papers EN
	3966	0.17686842	0.036618602	Oil palm papers	EN	Oil palm papers EN
	5233	0.182904089	0.093241082	Oil palm papers	EN	Oil palm papers EN
	9682	0.136636236	0.087317756	Oil palm papers	EN	Oil palm papers EN
	7919	0.138336274	0.14477666	Oil palm papers	EN	Oil palm papers EN
	12643	0.227196683	0.17594172	Oil palm papers	EN	Oil palm papers EN
	7202	0.183776777	0.118876145	Oil palm papers	EN	Oil palm papers EN
	13822	0.200456802	0.05788977	Oil palm papers	EN	Oil palm papers EN
	7653	0.250804336	0.049449884	Oil palm papers	EN	Oil palm papers EN
	5181	0.127061957	0.068470179	Oil palm papers	EN	Oil palm papers EN
	5311	0.245359992	0.222289239	Oil palm papers	EN	Oil palm papers EN
	7227	0.206650637	0.070590186	Oil palm papers	EN	Oil palm papers EN
	14308	0.221033235	0.204745619	Oil palm papers	EN	Oil palm papers EN
	5921	0.171612801	0.130680844	Oil palm papers	EN	Oil palm papers EN
	6913	0.141721971	0.076103243	Oil palm papers	EN	Oil palm papers EN
	8432	0.165273352	0.088003272	Oil palm papers	EN	Oil palm papers EN
	7661	0.163203163	0.05934707	Oil palm papers	EN	Oil palm papers EN
	8906	0.168343742	0.143051636	Oil palm papers	EN	Oil palm papers EN
	4797	0.189072754	0.159272232	Oil palm papers	EN	Oil palm papers EN
	3535	0.211632975	0.057370812	Oil palm papers	EN	Oil palm papers EN
	7408	0.155446301	0.141851115	Oil palm papers	EN	Oil palm papers EN
	7144	0.184980719	0.147619764	Oil palm papers	EN	Oil palm papers EN
	13090	0.227964432	0.205387913	Oil palm papers	EN	Oil palm papers EN
	5083	0.154625057	0.117576066	Oil palm papers	EN	Oil palm papers EN
	8221	0.161235564	0.041983044	Oil palm papers	EN	Oil palm papers EN
	405	0.101518304	0.110189263	Oil palm papers	EN	Oil palm papers EN
	4355	0.217656561	0.156706986	Oil palm papers	EN	Oil palm papers EN
	11478	0.135139352	0.098271162	Oil palm papers	EN	Oil palm papers EN
	5402	0.202755286	0.15069169	Oil palm papers	EN	Oil palm papers EN
	2276	0.223069717	0.218468379	Oil palm papers	EN	Oil palm papers EN
	8064	0.167766932	0.149453072	Oil palm papers	EN	Oil palm papers EN
	3390	0.248558962	0.208227061	Oil palm papers	EN	Oil palm papers EN
	5527	0.207291859	0.053870251	Oil palm papers	EN	Oil palm papers EN
	7525	0.203032633	0.150096515	Oil palm papers	EN	Oil palm papers EN
	6355	0.183146659	0.14129196	Oil palm papers	EN	Oil palm papers EN
	6328	0.175535007	0.128859712	Oil palm papers	EN	Oil palm papers EN
	13782	0.242780215	0.133164323	Oil palm papers	EN	Oil palm papers EN
	6488	0.221978379	0.188911853	Oil palm papers	EN	Oil palm papers EN
	7074	0.157841749	0.11098793	Oil palm papers	EN	Oil palm papers EN
	7201	0.149314948	0.025472422	Oil palm papers	EN	Oil palm papers EN
	3329	0.176714816	0.109354793	Oil palm papers	EN	Oil palm papers EN
	6411	0.185586233	0.144992452	Oil palm papers	EN	Oil palm papers EN
	8266	0.136996045	0.130797589	Oil palm papers	EN	Oil palm papers EN
	7856	0.184325188	0.147360229	Oil palm papers	EN	Oil palm papers EN
	5660	0.216472672	0.136348751	Oil palm papers	EN	Oil palm papers EN
	9241	0.155940022	0.120289947	Oil palm papers	EN	Oil palm papers EN
	13982	0.192961473	0.140914792	Oil palm papers	EN	Oil palm papers EN
	6613	0.187654999	0.103580633	Oil palm papers	EN	Oil palm papers EN
	5524	0.160028898	0.108414562	Oil palm papers	EN	Oil palm papers EN
	6174	0.174534671	0.181732246	Oil palm papers	EN	Oil palm papers EN
	5009	0.150521756	0.05591025	Oil palm papers	EN	Oil palm papers EN
	15073	0.240757455	0.088121581	Oil palm papers	EN	Oil palm papers EN
	7942	0.176622298	0.164548787	Oil palm papers	EN	Oil palm papers EN
	12884	0.236506984	0.154661817	Oil palm papers	EN	Oil palm papers EN
	13702	0.228867514	0.165052649	Oil palm papers	EN	Oil palm papers EN
	7805	0.151838121	0.045679085	Oil palm papers	EN	Oil palm papers EN
	5491	0.158987146	0.090313036	Oil palm papers	EN	Oil palm papers EN
	7287	0.19967904	0.037504489	Oil palm papers	EN	Oil palm papers EN
	6744	0.181134208	0.005565457	Oil palm papers	EN	Oil palm papers EN
	8434	0.20251164	0.127196985	Oil palm papers	EN	Oil palm papers EN
	12189	0.209607561	0.116896138	Oil palm papers	EN	Oil palm papers EN
	7786	0.205674641	0.070555199	Oil palm papers	EN	Oil palm papers EN
	9157	0.203466453	0.053381573	Oil palm papers	EN	Oil palm papers EN
	3623	0.147286368	0.097528158	Oil palm papers	EN	Oil palm papers EN
	8022	0.165087255	0.154038705	Oil palm papers	EN	Oil palm papers EN
	11545	0.195906662	0.136972075	Oil palm papers	EN	Oil palm papers EN
	6146	0.237678614	0.115799216	Oil palm papers	EN	Oil palm papers EN
	5892	0.139956389	0.129619599	Oil palm papers	EN	Oil palm papers EN
	14512	0.184651848	0.119612832	Oil palm papers	EN	Oil palm papers EN
	13088	0.174160225	0.090902298	Oil palm papers	EN	Oil palm papers EN
	8605	0.16743617	0.047700908	Oil palm papers	EN	Oil palm papers EN
	7717	0.229200723	0.175031046	Oil palm papers	EN	Oil palm papers EN
	7240	0.205042108	0.129248077	Oil palm papers	EN	Oil palm papers EN
	3982	0.158145754	0.045104628	Oil palm papers	EN	Oil palm papers EN
	7054	0.163047111	0.108586787	Oil palm papers	EN	Oil palm papers EN
	10386	0.186879984	0.115136389	Oil palm papers	EN	Oil palm papers EN
	8048	0.258060531	0.164184472	Oil palm papers	EN	Oil palm papers EN
	8106	0.200203318	0.117214257	Oil palm papers	EN	Oil palm papers EN
	8958	0.136619736	0.111511092	Oil palm papers	EN	Oil palm papers EN
	6836	0.190973287	0.108366107	Oil palm papers	EN	Oil palm papers EN
	9777	0.157354165	0.103659695	Oil palm papers	EN	Oil palm papers EN
	10888	0.227027797	0.070987232	Oil palm papers	EN	Oil palm papers EN
	8469	0.21137551	0.203652333	Oil palm papers	EN	Oil palm papers EN
	3755	0.34681886	0.221530728	Oil palm papers	EN	Oil palm papers EN
	13470	0.198373332	0.090463295	Oil palm papers	EN	Oil palm papers EN
	9338	0.221823125	0.07857116	Oil palm papers	EN	Oil palm papers EN
	4609	0.113725217	0.04160412	Oil palm papers	EN	Oil palm papers EN
	10960	0.177595077	0.114245311	Oil palm papers	EN	Oil palm papers EN
	9781	0.182322002	0.090182937	Oil palm papers	EN	Oil palm papers EN
	404	0.291460597	0.232333497	Oil palm news	EN	Oil palm news EN
	874	0.225653873	0.171070584	Oil palm news	EN	Oil palm news EN
	400	0.211444504	0.076922305	Oil palm news	EN	Oil palm news EN
	863	0.239792676	0.023958596	Oil palm news	EN	Oil palm news EN
	1474	0.282129055	0.030111734	Oil palm news	EN	Oil palm news EN
	1505	0.30802696	0.380889565	Oil palm news	EN	Oil palm news EN
	424	0.210188049	0.379465754	Oil palm news	EN	Oil palm news EN
	500	0.261058274	0.230689613	Oil palm news	EN	Oil palm news EN
	946	0.397855663	-0.056659209	Oil palm news	EN	Oil palm news EN
	721	0.283737997	0.178679464	Oil palm news	EN	Oil palm news EN
	873	0.255410108	0.080712923	Oil palm news	EN	Oil palm news EN
	664	0.230026206	0.139353559	Oil palm news	EN	Oil palm news EN
	332	0.267991465	0.196023126	Oil palm news	EN	Oil palm news EN
	863	0.283146028	0.107710096	Oil palm news	EN	Oil palm news EN
	1203	0.199050401	0.147442417	Oil palm news	EN	Oil palm news EN
	286	0.219003048	0.223100737	Oil palm news	EN	Oil palm news EN
	349	0.151955698	0.001509993	Oil palm news	EN	Oil palm news EN
	827	0.239523085	0.175237687	Oil palm news	EN	Oil palm news EN
	5176	0.245698515	0.16646169	Oil palm news	EN	Oil palm news EN
	899	0.254171434	0.11849405	Oil palm news	EN	Oil palm news EN
	392	0.204281131	0.020237912	Oil palm news	EN	Oil palm news EN
	813	0.186375584	0.167671306	Oil palm news	EN	Oil palm news EN
	2196	0.233285406	0.025547119	Oil palm news	EN	Oil palm news EN
	861	0.255909929	0.058773827	Oil palm news	EN	Oil palm news EN
	1014	0.234744893	0.137252256	Oil palm news	EN	Oil palm news EN
	883	0.321104343	-0.035339103	Oil palm news	EN	Oil palm news EN
	665	0.250843394	0.06011209	Oil palm news	EN	Oil palm news EN
	548	0.22600207	-0.067912244	Oil palm news	EN	Oil palm news EN
	580	0.314549888	0.36940373	Oil palm news	EN	Oil palm news EN
	1400	0.215523544	0.279116438	Oil palm news	EN	Oil palm news EN
	1190	0.182785456	0.127037707	Oil palm news	EN	Oil palm news EN
	373	0.202400093	0.168323155	Oil palm news	EN	Oil palm news EN
	600	0.224411088	0.347247582	Oil palm news	EN	Oil palm news EN
	804	0.229912742	0.04580076	Oil palm news	EN	Oil palm news EN
	562	0.257144444	0.263429553	Oil palm news	EN	Oil palm news EN
	974	0.264298487	-0.001722943	Oil palm news	EN	Oil palm news EN
	2480	0.293897586	-0.066850842	Oil palm news	EN	Oil palm news EN
	335	0.141123466	0.150227756	Oil palm news	EN	Oil palm news EN
	346	0.190727133	0.537149669	Oil palm news	EN	Oil palm news EN
	1021	0.248748825	-0.061857414	Oil palm news	EN	Oil palm news EN
	737	0.224865378	0.247920847	Oil palm news	EN	Oil palm news EN
	882	0.293192881	0.107516568	Oil palm news	EN	Oil palm news EN
	940	0.177367748	-0.023018262	Oil palm news	EN	Oil palm news EN
	393	0.231967958	0.263999243	Oil palm news	EN	Oil palm news EN
	955	0.263833483	0.110458089	Oil palm news	EN	Oil palm news EN
	373	0.205114089	0.071421121	Oil palm news	EN	Oil palm news EN
	490	0.170239646	0.001195911	Oil palm news	EN	Oil palm news EN
	521	0.273685694	0.017051708	Oil palm news	EN	Oil palm news EN
	524	0.208933527	0.299260507	Oil palm news	EN	Oil palm news EN
	471	0.23750853	0.18099392	Oil palm news	EN	Oil palm news EN
	811	0.25823055	0.013724945	Oil palm news	EN	Oil palm news EN
	509	0.323430767	0.366932002	Oil palm news	EN	Oil palm news EN
	683	0.185600365	0.343373573	Oil palm news	EN	Oil palm news EN
	1116	0.309351106	0.176344695	Oil palm news	EN	Oil palm news EN
	478	0.460417657	0.093884438	Oil palm news	EN	Oil palm news EN
	660	0.264272891	0.169630681	Oil palm news	EN	Oil palm news EN
	318	0.323249099	0.287685294	Oil palm news	EN	Oil palm news EN
	523	0.225338138	0.179581565	Oil palm news	EN	Oil palm news EN
	309	0.229557455	0.200850155	Oil palm news	EN	Oil palm news EN
	244	0.190678355	0.090189837	Oil palm news	EN	Oil palm news EN
	899	0.280141881	0.227649689	Oil palm news	EN	Oil palm news EN
	686	0.217199855	0.136352027	Oil palm news	EN	Oil palm news EN
	561	0.318405154	0.059414726	Oil palm news	EN	Oil palm news EN
	1118	0.338907314	0.146947571	Oil palm news	EN	Oil palm news EN
	509	0.251385233	0.121983749	Oil palm news	EN	Oil palm news EN
	279	0.252674044	0.208598131	Oil palm news	EN	Oil palm news EN
	395	0.308553537	0.286280781	Oil palm news	EN	Oil palm news EN
	489	0.225290362	0.177873741	Oil palm news	EN	Oil palm news EN
	197	0.167630603	0.142257379	Oil palm news	EN	Oil palm news EN
	348	0.314791569	0.298279325	Oil palm news	EN	Oil palm news EN
	527	0.212486019	0.167439429	Oil palm news	EN	Oil palm news EN
	785	0.268588332	0.010688378	Oil palm news	EN	Oil palm news EN
	602	0.236832821	0.037318329	Oil palm news	EN	Oil palm news EN
	405	0.340016091	-0.076124178	Oil palm news	EN	Oil palm news EN
	775	0.229605651	0.075961106	Oil palm news	EN	Oil palm news EN
	878	0.230458766	0.267326333	Oil palm news	EN	Oil palm news EN
	1352	0.250321969	0.183581088	Oil palm news	EN	Oil palm news EN
	657	0.127921245	-0.122055044	Oil palm news	EN	Oil palm news EN
	613	0.181666866	0.12747654	Oil palm news	EN	Oil palm news EN
	125	0.261899127	-0.020426841	Oil palm news	EN	Oil palm news EN
	1964	0.296796209	0.136244082	Oil palm news	EN	Oil palm news EN
	864	0.316947091	0.041996641	Oil palm news	EN	Oil palm news EN
	959	0.263685713	-0.008745317	Oil palm news	EN	Oil palm news EN
	3754	0.236546273	0.104391777	Oil palm news	EN	Oil palm news EN
	486	0.207958031	-0.05089027	Oil palm news	EN	Oil palm news EN
	1230	0.260577724	0.319960213	Oil palm news	EN	Oil palm news EN
	988	0.245234721	0.259598281	Oil palm news	EN	Oil palm news EN
	291	0.242692816	0.266496416	Oil palm news	EN	Oil palm news EN
	352	0.227560216	0.151722951	Oil palm news	EN	Oil palm news EN
	2426	0.357924077	0.097176113	Oil palm news	EN	Oil palm news EN
	1950	0.2122341	0.151779873	Oil palm news	EN	Oil palm news EN
	1075	0.230959472	0.302455089	Oil palm news	EN	Oil palm news EN
	2799	0.23673293	0.011143707	Oil palm news	EN	Oil palm news EN
	721	0.362543261	0.05812928	Oil palm news	EN	Oil palm news EN
	1172	0.287103311	0.151621824	Oil palm news	EN	Oil palm news EN
	1118	0.279508219	0.003813146	Oil palm news	EN	Oil palm news EN
	2121	0.29047127	0.06007673	Oil palm news	EN	Oil palm news EN
	916	0.268690754	0.288159975	Oil palm news	EN	Oil palm news EN
	514	0.268543293	0.108649955	Oil palm news	EN	Oil palm news EN
	639	0.467252746	0.083053524	Oil palm news	EN	Oil palm news EN
	650	0.268263537	0.239650008	Oil palm news	EN	Oil palm news EN
	627	0.332032129	0.06131903	Oil palm news	EN	Oil palm news EN
	1699	0.237284096	-0.034128743	Oil palm news	EN	Oil palm news EN
	265	0.097913966	0.221027241	Oil palm news	EN	Oil palm news EN
	1812	0.307863119	0.278391051	Oil palm news	EN	Oil palm news EN
	873	0.213942881	0.151628395	Oil palm news	EN	Oil palm news EN
	1838	0.261227705	0.123653211	Oil palm news	EN	Oil palm news EN
	1064	0.277725434	0.021039281	Oil palm news	EN	Oil palm news EN
	865	0.218907321	0.042669302	Oil palm news	EN	Oil palm news EN
	2671	0.275437993	0.003378261	Oil palm news	EN	Oil palm news EN
	666	0.27284971	0.146840076	Oil palm news	EN	Oil palm news EN
	277	0.093390449	0.18191057	Oil palm news	EN	Oil palm news EN
	592	0.25372945	0.267815081	Oil palm news	EN	Oil palm news EN
	427	0.286752957	0.247209472	Oil palm news	EN	Oil palm news EN
	2896	0.291050544	0.297784941	Oil palm news	EN	Oil palm news EN
	427	0.253656893	0.276222898	Oil palm news	EN	Oil palm news EN
	1713	0.226946095	-0.081402438	Oil palm news	EN	Oil palm news EN
	1749	0.258945362	0.201240147	Oil palm news	EN	Oil palm news EN
	523	0.256673656	0.251510618	Oil palm news	EN	Oil palm news EN
	966	0.257170961	0.213239641	Oil palm news	EN	Oil palm news EN
	1040	0.352772817	0.08886845	Oil palm news	EN	Oil palm news EN
	1272	0.173255614	0.097745855	Oil palm news	EN	Oil palm news EN
	773	0.235388221	0.061769794	Oil palm news	EN	Oil palm news EN
	688	0.340801347	0.325468867	Oil palm news	EN	Oil palm news EN
	689	0.196484558	0.198038737	Oil palm news	EN	Oil palm news EN
	615	0.227357436	0.26404952	Oil palm news	EN	Oil palm news EN
	271	0.281275765	0.303495264	Oil palm news	EN	Oil palm news EN
	462	0.204663865	0.242832299	Oil palm news	EN	Oil palm news EN
	684	0.325676995	0.415905849	Oil palm news	EN	Oil palm news EN
	611	0.457508378	0.356791927	Oil palm news	EN	Oil palm news EN
	993	0.326873029	0.210912001	Oil palm news	EN	Oil palm news EN
	3527	0.298620692	0.288587085	Oil palm news	EN	Oil palm news EN
	308	0.187083584	0.175244344	Oil palm news	EN	Oil palm news EN
	463	0.192224594	0.227190847	Oil palm news	EN	Oil palm news EN
	991	0.292775735	0.220637155	Oil palm news	EN	Oil palm news EN
	749	0.229595338	0.219142432	Oil palm news	EN	Oil palm news EN
	802	0.390462522	0.281939898	Oil palm news	EN	Oil palm news EN
	276	0.240281482	0.213623909	Oil palm news	EN	Oil palm news EN
	924	0.251928359	0.097512211	Oil palm news	EN	Oil palm news EN
	427	0.185771859	0.178348944	Oil palm news	EN	Oil palm news EN
	466	0.202469841	0.103927189	Oil palm news	EN	Oil palm news EN
	252	0.432734134	-0.018747663	Oil palm news	EN	Oil palm news EN
	892	0.342252221	0.277412873	Oil palm news	EN	Oil palm news EN
	275	0.268233792	0.283033816	Oil palm news	EN	Oil palm news EN
	2625	0.220688037	0.012880051	Oil palm news	EN	Oil palm news EN
	361	0.320586426	0.223240944	Oil palm news	EN	Oil palm news EN
	11119	0.298039385	0.348770123	Oil palm news	EN	Oil palm news EN
	1841	0.31320315	0.14185282	Oil palm news	EN	Oil palm news EN
	839	0.389158862	0.288502155	Oil palm news	EN	Oil palm news EN
	792	0.250146479	-0.011496027	Oil palm news	EN	Oil palm news EN
	421	0.247992522	-0.114212428	Oil palm news	EN	Oil palm news EN
	899	0.342299847	0.205104289	Oil palm news	EN	Oil palm news EN
	586	0.254561213	0.378725356	Oil palm news	EN	Oil palm news EN
	505	0.350408977	-0.020397351	Oil palm news	EN	Oil palm news EN
	9660	0.25884177	0.22264549	Oil palm news	EN	Oil palm news EN
	479	0.251394924	0.327176856	Oil palm news	EN	Oil palm news EN
	1138	0.182079662	-0.03264909	Oil palm news	EN	Oil palm news EN
	13005	0.282156015	0.20639288	Oil palm news	EN	Oil palm news EN
	626	0.166272633	-0.027083226	Oil palm news	EN	Oil palm news EN
	1345	0.243817496	0.088195756	Oil palm news	EN	Oil palm news EN
	1275	0.35179132	0.051872772	Oil palm news	EN	Oil palm news EN
	1633	0.32116412	0.045746014	Oil palm news	EN	Oil palm news EN
	584	0.12822033	0.078310955	Oil palm news	EN	Oil palm news EN
	644	0.236507831	0.257842343	Oil palm news	EN	Oil palm news EN
	1263	0.256699941	0.302996952	Oil palm news	EN	Oil palm news EN
	756	0.267363331	0.250519793	Oil palm news	EN	Oil palm news EN
	559	0.223604875	0.286174938	Oil palm news	EN	Oil palm news EN
	788	0.317746911	0.315106081	Oil palm news	EN	Oil palm news EN
	1980	0.295972494	0.128649857	Oil palm news	EN	Oil palm news EN
	873	0.222169818	0.353754627	Oil palm news	EN	Oil palm news EN
	549	0.332884987	-0.235542915	Oil palm news	EN	Oil palm news EN
	1330	0.263105799	0.182970511	Oil palm news	EN	Oil palm news EN
	504	0.296657572	0.127100603	Oil palm news	EN	Oil palm news EN
	2512	0.277422001	-0.059615625	Oil palm news	EN	Oil palm news EN
	886	0.254197182	0.194245331	Oil palm news	EN	Oil palm news EN
	1398	0.205740403	-0.021702675	Oil palm news	EN	Oil palm news EN
	2096	0.254028282	0.229645449	Oil palm news	EN	Oil palm news EN
	392	0.180544082	-0.006760134	Oil palm news	EN	Oil palm news EN
	1039	0.286362936	-0.102706503	Oil palm news	EN	Oil palm news EN
	717	0.223245364	0.112322183	Oil palm news	EN	Oil palm news EN
	1643	0.270584206	0.008191627	Oil palm news	EN	Oil palm news EN
	3579	0.317223965	0.188372774	Oil palm news	EN	Oil palm news EN
	2152	0.359462587	0.217195438	Oil palm news	EN	Oil palm news EN
	588	0.268126867	0.214826233	Oil palm news	EN	Oil palm news EN
	286	0.303634717	0.052315249	Oil palm news	EN	Oil palm news EN
	834	0.323233748	0.26976527	Oil palm news	EN	Oil palm news EN
	628	0.203943172	0.150713179	Oil palm news	EN	Oil palm news EN
	1993	0.208731105	0.171998873	Oil palm news	EN	Oil palm news EN
	497	0.187694418	-0.017769328	Oil palm news	EN	Oil palm news EN
	703	0.26741697	0.006659916	Oil palm news	EN	Oil palm news EN
	2111	0.333017208	-0.097260026	Oil palm news	EN	Oil palm news EN
	1406	0.28290027	0.087799727	Oil palm news	EN	Oil palm news EN
	768	0.301502497	0.327717167	Oil palm news	EN	Oil palm news EN
	665	0.25051732	0.321912762	Oil palm news	EN	Oil palm news EN
	574	0.245990492	0.318576902	Oil palm news	EN	Oil palm news EN
	2262	0.296265977	0.20245093	Oil palm news	EN	Oil palm news EN
	1201	0.200378676	0.10379303	Oil palm news	EN	Oil palm news EN
	625	0.180406515	0.103144385	Oil palm news	EN	Oil palm news EN
	1573	0.286566347	0.259674876	Oil palm news	EN	Oil palm news EN
	709	0.200123211	0.049840086	Oil palm news	EN	Oil palm news EN
	509	0.233203445	0.170248717	Oil palm news	EN	Oil palm news EN
	1109	0.269819519	0.274505525	Oil palm news	EN	Oil palm news EN
	906	0.327135286	0.192359124	Oil palm news	EN	Oil palm news EN
	1365	0.242000469	0.006409215	Oil palm news	EN	Oil palm news EN
	364	0.229212774	0.023393723	Oil palm news	EN	Oil palm news EN
	5082	0.228216229	0.071488303	Oil palm news	EN	Oil palm news EN
	444	0.318731028	0.040163139	Oil palm news	EN	Oil palm news EN
	633	0.307148438	0.058345377	Oil palm news	EN	Oil palm news EN
	1510	0.248543913	0.059697115	Oil palm news	EN	Oil palm news EN
	359	0.324133763	0.049493364	Oil palm news	EN	Oil palm news EN
	3782	0.205651183	0.088880685	Oil palm news	EN	Oil palm news EN
	379	0.193387332	0.272800747	Oil palm news	EN	Oil palm news EN
	580	0.273874954	-0.047160317	Oil palm news	EN	Oil palm news EN
	668	0.267207566	0.214225487	Oil palm news	EN	Oil palm news EN
	834	0.293879109	-0.055639448	Oil palm news	EN	Oil palm news EN
	754	0.311275159	-0.017635284	Oil palm news	EN	Oil palm news EN
	863	0.301129578	0.082139027	Oil palm news	EN	Oil palm news EN
	584	0.322639697	0.354360078	Oil palm news	EN	Oil palm news EN
	654	0.22074176	-0.158211079	Oil palm news	EN	Oil palm news EN
	683	0.243026326	-0.007350418	Oil palm news	EN	Oil palm news EN
	391	0.239493847	0.192435407	Oil palm news	EN	Oil palm news EN
	439	0.369708202	0.239114099	Oil palm news	EN	Oil palm news EN
	672	0.272999186	0.093386098	Oil palm news	EN	Oil palm news EN
	340	0.300935966	-0.047530856	Oil palm news	EN	Oil palm news EN
	1267	0.234445004	0.065869679	Oil palm news	EN	Oil palm news EN
	559	0.268830403	0.014356458	Oil palm news	EN	Oil palm news EN
	1527	0.282786145	0.209074963	Oil palm news	EN	Oil palm news EN
	4736	0.277085519	0.095251861	Oil palm news	EN	Oil palm news EN
	1701	0.261089948	-0.054980208	Oil palm news	EN	Oil palm news EN
	684	0.340501575	0.017792205	Oil palm news	EN	Oil palm news EN
	346	0.174127996	0.018885571	Oil palm news	EN	Oil palm news EN
	683	0.231604417	-0.115839384	Oil palm news	EN	Oil palm news EN
	936	0.241798292	0.027744823	Oil palm news	EN	Oil palm news EN
	637	0.33006994	-0.063575195	Oil palm news	EN	Oil palm news EN
	572	0.277139091	-0.168845753	Oil palm news	EN	Oil palm news EN
	956	0.250756652	-0.02400643	Oil palm news	EN	Oil palm news EN
	760	0.229923397	-0.013315064	Oil palm news	EN	Oil palm news EN
	734	0.221962305	-0.046801598	Oil palm news	EN	Oil palm news EN
	720	0.187252513	-0.005801833	Oil palm news	EN	Oil palm news EN
